# Supplementary material for: The synergistic impact of ENSO and IOD on the Indian Summer Monsoon Rainfall in observations and climate simulations - an information theory perspective
Source: Copernicus journal article supplement (doi:10.5194/esd-2020-50), 2020-07-15
Supplement: Supplementary file [file esd-2020-50-AC1-supplement.pdf]

Dear Dr Didier Vega-Oliveros and Dr Benjamin L. Ruddell,

Thank you very much for your very helpful and constructive comments. Here, you can find point by point replies to your comments and suggestions.

Reviewer comments in: Black

Our reply in: Blue

### Review by Dr Didier Vega-Oliveros:

1. The work has its merits, is interesting and relevant for the area, with the potential of future works and interdisciplinary developments. The manuscript is clear and easy to follow, but quite extensive, in which the structure and order of the sections could be improved.

Thank you for your nice comment. We hope that our application of information theory methods on climate data will open up new perspectives in the climate science community.

We agree that our manuscript is a bit extensive. However, as our work applies various methods from information theory to climate data, we had to discuss our methods in detail and test them before applying to observations, reanalysis, GCMs, and RCMs for the benefit of readers who are new to information theory. Nevertheless, following your suggestions, we moved few sentences about information theory from Introduction to Methodology Section and also some idealized test cases to Appendix Section as suggested by Dr Benjamin Ruddell (details of the changes are provided in our replies to your specific comments).

2. First, in the Introduction, the sentences: "Shannon (1948) first introduced the concept of information entropy, which quantifies the average uncertainty of a given random variable. The IE between two subsystems X and Y can be understood as the average uncertainty reduction about X in knowing Y or vice versa." and all the part of "The IE in a system composed of two-source systems Y and Z ... alone but by jointly knowing their states together." are adequate to the Material and Methods section than the Introduction. Please, consider moving these parts to the method Section and refer to it in the Introduction if necessary.

We moved the lines you stated to the Methodology Section 2 (changes are highlighted with blue/red color in edited manuscript attached below for reviewers quick reference). However, we had retained some important brief explanations of information theory in the Introduction Section for the readers to have a quick understanding of the information exchange concepts.

3. This reviewer also suggests moving the Material and Method sections to be the last part of the manuscript and promptly presenting the results of the work. Besides, the authors can move some broadly and detailed concepts to the supplemental material.

Thank you for the suggestion. We would like to start with the Methodology Section as it helps the reader to follow the new metrics from information theory before reading the results from the idealized as well as the climate applications. Hence, we maintained the same order in our revised manuscript.

4. Before recommending the article's acceptance, there is a further analysis that this reviewer will ask the authors. Could you please run the same analysis in observational

data for the same regions but instead considering an outside temporal season (e.g., DJFM)? In this way, we can get more insides and understanding of the proposed method and how well are the behaviors and results. For example, if one wants to check other regions and phenomena, to discover new dynamical/physical connections, it would be feasible to apply this method and found if there are pieces of evidence of physical connection or not, (like can be done with many other approaches and knowing their drawbacks). With a negative test in real data, the authors can show the robustness of their method and the ability to be used to test other systems.

We agree with your point of concern on testing the methods outside the seasons (DJFM) where the IOD and ENSO combined influence is not observed. As per your suggestion, we have tested our methods over the observational data for the months of DJFM and as expected, the ENSO and IOD do not synergistically contribute to the rainfall for the months of DJFM (we added this line in our revised manuscript). Here are our results and detailed discussion.

Figure R1 represents the EOF modes for ENSO and IOD over the Pacific and Indian Oceans respectively. From the literature, it is known that the ENSO mode over the Pacific Ocean peaks at the end of the year <sup>(1)</sup>, while the IOD ends in November and starts again in May<sup>(2)</sup>. From the figures R1-R3, it is seen that the ENSO SST anomalies are clearly formed. The IOD SST anomalies for the months of DJFM are not well formed as compared to the anomaly structure seen for the month of JJAS (Fig. 3 in our manuscript). These results fit well with the existing literature.

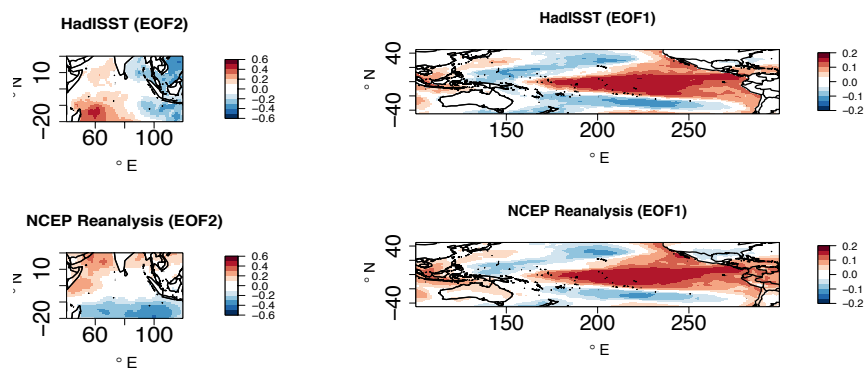

**Fig. R1:** EOF2 patterns of SST anomalies (DJFM) in the Indian ocean and EOF1 patterns in the Pacific ocean for observed HadISST and NCEP reanalysis.

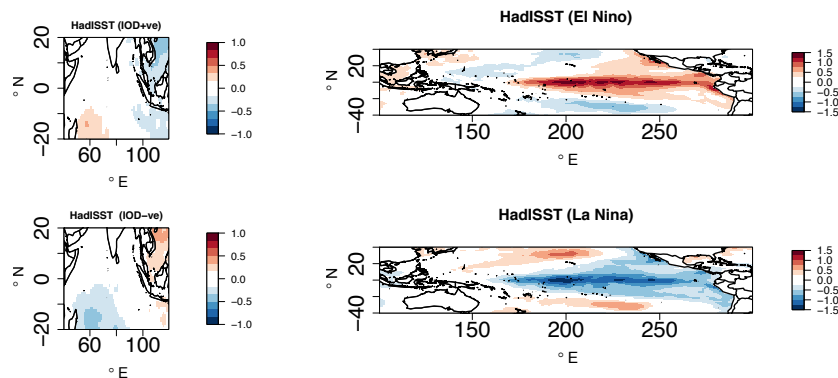

**Fig. R2:** SST composites for various phases of IOD and ENSO events for the months of DJFM for HadISST observational data.

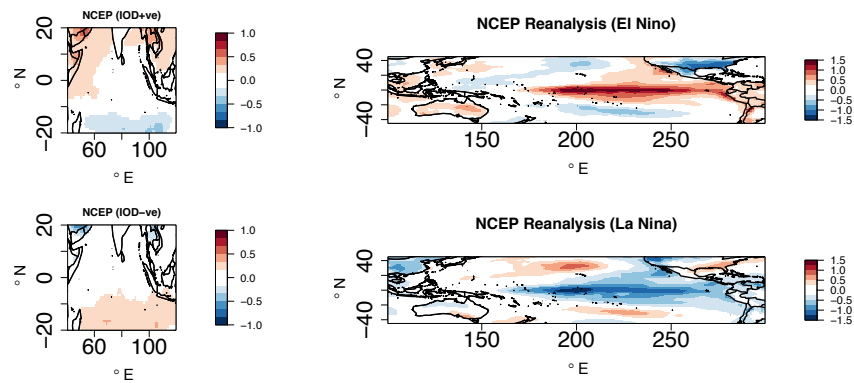

**Fig. R3:** SST composites for various phases of IOD and ENSO events for the months of DJFM for NCEP Reanalysis data.

Figure R4 shows that the linear fit between the Indian Ocean PCs of EOF-2 obtained from the HadISST against the observed IOD index has a correlation of about 0.51, and the correlation of NCEP reanalysis SST with the observed IOD index is 0.12. The NCEP reanalysis data for the months of DJFM is unable to replicate the IOD structures as compared to the observed HadISST. However, the correlation of both data sets with the IOD index is higher in JJAS compared with the DJFM. This can be attributed to the weak amplitude of IOD during DJFM seasons compared to JJAS. The PCs associated with the first EOF over the Pacific Ocean are highly correlated against the observed Niño 3.4 index with a correlation value of 0.86 for both data sets indicating that the EOF1 captures the ENSO like variability. The correlation for the months of DJFM is greater than the JJAS months. This might be due to the ENSO peak in the months of DJFM. The variability of the IOD and ENSO modes for the months of DJFM is also consistent with the literature<sup>(3)</sup>.

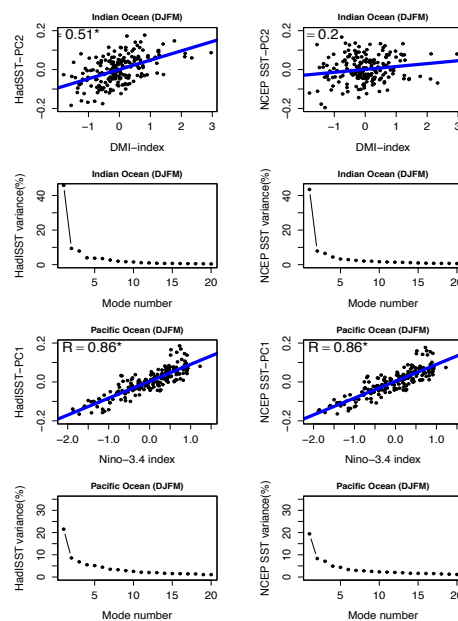

**Fig. R4:** Regressions of PCs obtained from their respective EOFs over the Indian and Pacific Oceans with the observed IOD and Niño 3.4 Index and their associated percentage contribution to the total variance for HadISST and NCEP reanalysis SST data sets for the months of DJFM

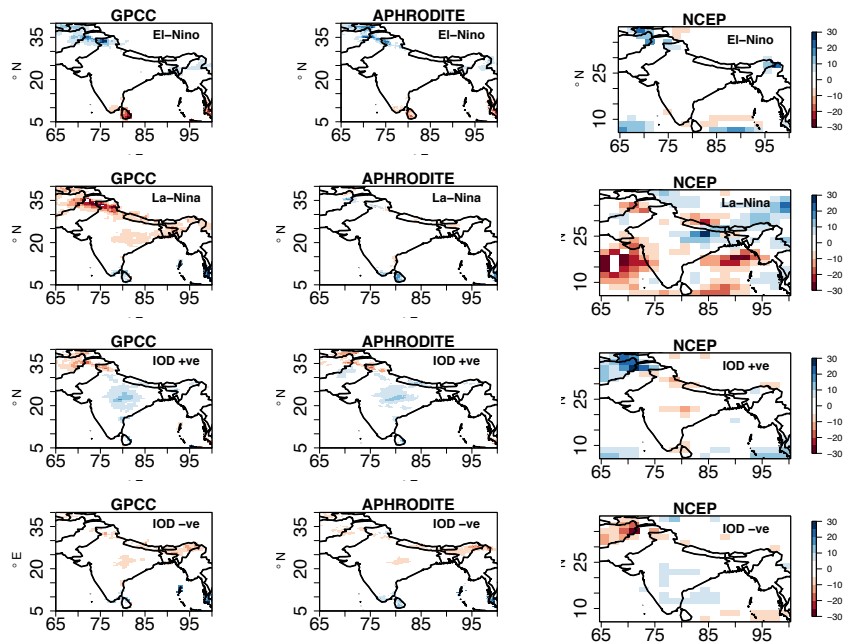

**Fig. R5:** Total precipitation anomaly (mm/month) composites (DJFM) over the Indian subcontinent for El-Niño, La-Niña, positive IOD and negative IOD events observed in GPCC, APHRODITE and NCEP reanalysis data sets for the period of 1951-2005.

Figure R5 represents the anomalies constructed by subtracting the Indian subcontinent climatology mean DJFM rainfall with the rainfall months associated with various phases of IOD and ENSO. The anomaly composites with El-Niño (La-Niña) events show that ENSO events influence the precipitation in winter over the northwest India. This influence is attributed to the intensification of the western disturbances over the northwest India due to the baroclinic response<sup>(4)</sup>. The composites of precipitation anomalies during the IOD<sup>+ve</sup> events show more than normal rainfall near the east coast and central India for the DJFM seasons for GPCC and APHRODITE datasets. The Influence of IOD on the winter rainfall over India is less studied compared to the JJAS rainfall. However, among the limited studies Kripalani and Kumar<sup>(5)</sup> 2004, showed the influence of IOD on the North East Monsoon rainfall during the months of October, November and December with IOD<sup>+ve</sup> events leading to more rainfall over Southern India and also towards North (see Fig. 9 in Kripalani and Kumar, 2004<sup>(5)</sup>). The IOD<sup>+ve</sup> influence also show positive rainfall anomaly in our study and this needs a detailed investigation on the process leading to it. It is worth to note here that the rainfall during DJFM is less than rainfall amount in JJAS shown in the manuscript.

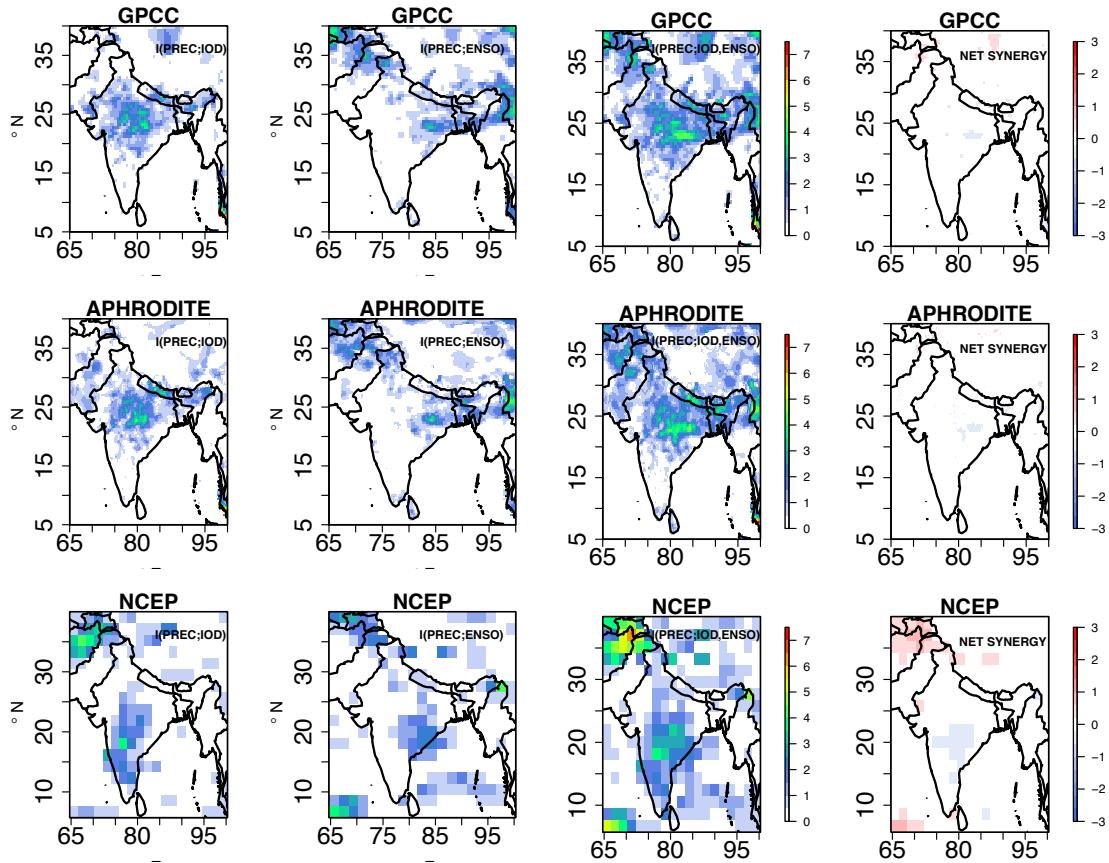

**Fig. R6:** Information exchange from I(PREC;IOD), I(PREC;ENSO), two-source information exchange I(PREC; ENSO,IOD) and NET SYNERGY  $\times 10^{-2}$  nats for observational data sets GPCC, APHRODITE and NCEP reanalysis. Only significant values at 95% confidence intervals are plotted.

Figure R6 shows the information exchange (IE) from the IOD to precipitation i.e., I(PREC;IOD), ENSO to precipitation i.e., I(PREC;ENSO), the two-source IE i.e., I(PREC;IOD,ENSO) together with the NET SYNERGY for the observations GPCC, APHRODITE, and the NCEP reanalysis data sets under linear approximation. The observed IE from IOD to total precipitation i.e., I(PREC;IOD) shows that the IOD transmits information to the north-central sector of the Indian subcontinent in the GPCC and APHRODITE data sets. The location at which the IE from IOD to the precipitation over the Indian subcontinent matches the significant rainfall anomalies. This is also true in the case of ENSO, where it influences the north-west sector of India. The net synergy plot show that the IOD and ENSO do not share any net synergistic information over the subcontinent. This is expected as the IOD and ENSO are known to act mutually in JJAS than the DJFM season. Our results reiterate the same here.

#### Minor comments/Suggestions

5. "provides an lowerbound for..." => "provides a lowerbound for..."

Rephrased as per the suggestion.

6. In lines 417 and 422, is it IE(...) or should be I(...)?

Thank you, as you mentioned it should be I(.). We changed it in the manuscript.

7. In lines 358 and 429, why the authors did not include these figures in the Supplemental material?

We tested the Linear, Kraskov and Kernel estimators for the idealized and climate applications. Since our manuscript is quite extensive and furthermore the climate application is near Gaussian, we showed the Linear estimator in the manuscript (the linear estimator is robust than the non-linear Kraskov or Kernel estimator as the non-linear estimators depend on the free tuning parameters in the estimation of PDF (Pothapakula et al., 2019)). But now we have included additional figures in the supplementary material (Fig.S4, Fig.S5, Fig.S11, Fig.S12, Fig.S13). We shall soon make our scripts available in GitHub.

8. About the estimator K-nearest neighbors (called here as Kraskov), how was the approach employed to find the best k by the authors? Did they try all possible values and choose the best one? How did they define or evaluate the best k?

Thank you for raising this important concern. Indeed the best k-parameter selection is very important for the Kraskov as the kernel width for the Kernel estimator. In our manuscript introduction Section we have mentioned the issues about the challenges involved in the estimation of information theory metrics with Kraskov, Kernel and Binning estimators for continuous data. We referred our earlier publication in Entropy which is also featured as a cover story about the quantification of information exchange in idealized and climate applications (<https://www.mdpi.com/1099-4300/21/11/1094>).

We proposed rigorous testing of the k-nearest and kernel width for consistency of the results in our previous publication. We followed similar principle in the current manuscript, for e.g., in the results section of idealized linear system, we mentioned that our free parameters i.e., kernel width and k-nearest neighbors are tested and tuned for consistent results with the test ranging from (20-60 neighbors) as well as (0.5-2 kernel widths). Similarly all our results are tested and tuned for consistent results. In addition, as the climate system data used in this study is near Gaussian, we also used robust linear estimator along sides with non-linear Kraskov and Kernel estimators.

In terms of code availability, it is a big plus and highly recommended that the authors publicly available their code in open source platforms (like GitHub, for instance). Therefore, other scholars and the community can use it to replicate the conclusions and compare it with their methods in future works.

Thank you, we agree. We will upload the codes in GitHub for public.

#### References:

1. <https://www.ncdc.noaa.gov/teleconnections/enso/enso-tech.php>
2. Ratnam JV, Dijkstra HA, Behera SK. A machine learning based prediction system for the Indian Ocean Dipole. *Sci Rep.* 2020;10(1):284. Published 2020 Jan 14. doi:10.1038/s41598-019-57162-8
3. Saji, NH., Goswami, BN., Vinayachandran PN., Yamagata T.: A dipole mode in the tropical Indian Ocean, *Nature*, 401,360–363, <https://doi.org/10.1038/43854>, 1999.
4. Yadav, R. K., J. H. Yoo, F. Kucharski, and M. A. Abid, 2010: Why Is ENSO Influencing Northwest India Winter Precipitation in Recent Decades?. *J. Climate*, **23**, 1979–1993, <https://doi.org/10.1175/2009JCLI3202.1>.
5. Kripalani RH, Kumar P. 2004. Northeast monsoon rainfall variability over south peninsular India vis-a`-vis Indian Ocean Dipole mode. *Int. J. Climatol.* **24**: 1267–1282.

**Review by Dr Benjamin L. Ruddell:**

Dear Dr Benjamin Ruddell,

Thank you very much for the constructive review and your time for reviewing our manuscript at these difficult times of COVID-19 crisis. Here you can find our point by point reply to your suggestions. Thank you once again.

Reviewer comments in: Black

Our reply in: Blue

1. Overall, this is a very interesting manuscript and deserves to be published with minor revisions. The technical methods are sound at the level of detail I am able to review them. The possible improvements lie in the communication and interpretation of the results.

Thank you very much for your suggestions and your constructive comments. We have addressed your concerns point by point.

2. I suggest shortening the manuscript dramatically, especially by moving to a supplement the early portions of the results and methods where the authors prove that the metrics capture the kind of information content and synergy that is relevant to this climate coupling. We already know these metrics work, so your validation is important as due diligence but not as an important result of the paper, in my opinion.

Indeed we agree that our manuscript is a bit extensive as we have tested three estimators on observation data, reanalysis data, three GCMs, and three RCM simulations. We aimed for a robust and extensive research on the information exchange in the observations along with the validation of GCM and RCM. Hence, the manuscript was extensive.

But, following your suggestions, we have moved the non-linear idealized system results and discussion part to the Appendix Section of the revised manuscript. However, we have retained only one example of the idealized test case in the manuscript as we believe it helps the reader to familiarize the concepts of synergy and information exchange.

3. I suggest considering and including more concepts and language about coupling, and/or causation (coupling is better in my opinion), as opposed to information content and synergy. Coupling, where appropriately interpretable, is a more intuitive and useful concept that is much more broadly understood than synergy or information content, and is better communication. I believe you are talking about a physical coupling between oceanic processes and the monsoon here, at least in part. Some of my papers get into process coupling concepts and language, including the original Ruddell and Kumar 2009 in Water Resources Research.

Thank you very much for this suggestion. We had been pondering on the use of language concerning the results from Information theory. In the climate application, we have used data from the GCM which are coupled to the ocean model. So, we applied information theory metrics to the coupled GCM, and hence we believe using the word “coupling” for the interpretation of Information exchange confuses the readers more often with the coupling of climate models. Therefore, as the current manuscript extensively uses/extends methods from our earlier manuscript (<https://www.mdpi.com/1099-4300/21/11/1094>), which discusses the methodology in detail, we prefer to be consistent with our terminology. Hence we have used information exchange and synergy in our manuscript. However, as you suggested we tried to give a plausible physical explanation of what synergy means in our interpretation of the results with IOD, ENSO on the Indian Summer Monsoon.

4. The major change I'd like to see is the inclusion of more interpretation of these results in terms of physical atmospheric process dynamics. What does this information content and synergy mean, physically? Can you confirm or reject a hypothesis about the processes that are are causing it, using these information statistics? What does this mean? Actually testing a hypothesis would be the best, but more discussion in the conclusions is also very helpful.

We agree with your concern regarding the physical atmospheric process dynamics.

We plotted the moisture transport anomalies (Fig. 6 in the manuscript) during the ENSO and IOD phases over the Indian domain. We observed that the anomalous negative moisture flux during the El-Niño is compensated with the positive moisture flux anomaly by IOD<sup>+ve</sup> especially in central India, and vice-versa during the La-Niña and IOD<sup>-ve</sup> events. This shows that both the IOD and ENSO states should be known together to explain the variability of the central Indian subcontinent rainfall. Hence we see the synergetic influence. We explained this in detail in lines 376-391.

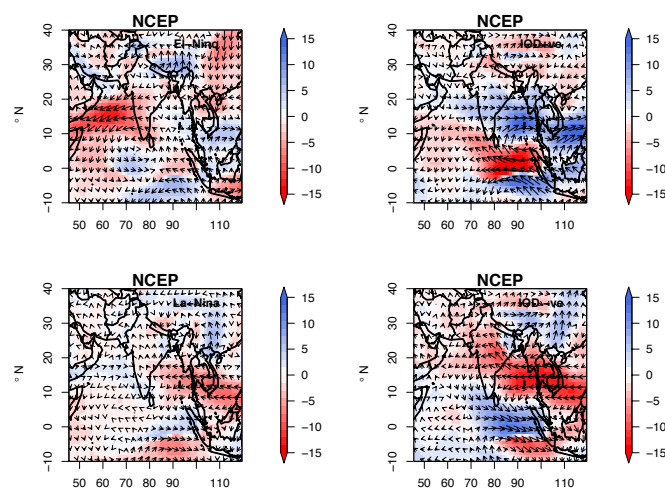



# The synergistic impact of ENSO and IOD on the Indian Summer Monsoon Rainfall in observations and climate simulations - an information theory perspective

Praveen Kumar Pothapakula<sup>1</sup>, Cristina Primo<sup>1</sup>, Silje Sørland<sup>2</sup>, and Bodo Ahrens<sup>1</sup>

<sup>1</sup>Institute for Atmospheric and Environmental Sciences, Goethe University Frankfurt am Main, Germany.

<sup>2</sup>Dep. of Environmental Systems Science, ETH Zürich, Switzerland.

**Correspondence:** Praveen Kumar Pothapakula (pothapakula@iau.uni-frankfurt.de)

**Abstract.** El-Niño southern oscillation (ENSO) and Indian Ocean Dipole (IOD) are two well-know temporal oscillations in the sea surface temperature (SST), which both are thought to influence the interannual variability of the Indian Summer Monsoon Rainfall (ISMR). Until now, there has been no measure to assess the simultaneous information exchange (IE) from both ENSO and IOD to ISMR. This study explores the information exchange from two source variables (ENSO and IOD) to one target (ISMR). First, in order to illustrate the concepts and quantification of two-source IE to a target, we use idealized test cases consisting of linear as well as non-linear dynamical systems. Our results show that these systems exhibit net synergy (i.e., the combined influence of two sources on a target is greater than the sum of their individual contributions), even with uncorrelated sources in both the linear and non-linear systems. We test IE quantification with various estimators (the Linear, Kernel, and Kraskov estimators) for robustness. Next, the two-source IE from ENSO and IOD to the ISMR is investigated in observations, reanalysis, three global climate model (GCM) simulations, and three nested, higher-resolution simulations using a regional climate model (RCM). This (1) quantifies IE from ENSO and IOD to ISMR in the natural system, and (2) applies IE in the evaluation of the GCM and RCM simulations. The results show that both ENSO and IOD contribute to the ISMR interannual variability. Interestingly, significant net synergy is noted in the central parts of the Indian subcontinent, which is India's monsoon core region. This indicates that both ENSO and IOD are synergistic predictors in the monsoon core region. But, they share significant net redundant information in the southern part of Indian subcontinent. The IE patterns in the GCM simulations differ substantially from the patterns derived from observations and reanalyses. Only one nested RCM simulation IE pattern adds value to the corresponding GCM simulation pattern. Only in this case, the GCM simulation shows realistic SST patterns and moisture transport during the various ENSO and IOD phases. This confirms, once again, the importance of the choice of the GCM in driving a higher-resolution RCM. This study shows that two-source IE is a useful metric that helps in better understanding the climate system and in process-oriented climate model evaluation.

## 1 Introduction

The South Asian Monsoon is considered as a large-scale coupled air-sea-land interaction phenomenon that brings seasonal rainfall to the Indian subcontinent and other near areas (Webster et al, 1988). Large parts of the Indian subcontinent receive

rainfall from June to September known as the Indian Summer Monsoon Rainfall (ISMR). The ISMR contributes about 70–90%  
25 to the total annual precipitation amount in the Indian subcontinent (Shukla and Haung, 2016). The agriculture in the Indian  
subcontinent depends substantially on the ISMR, and any variations on the interannual as well as intraseasonal variabilities  
of ISMR cause a significant impact on the country's economy. The interannual variation of the IMSR is only about 10% of  
the mean (Gadgil, 2003), yet it has a large impact on crop production. The mean seasonal rainfall predictability significantly  
depends on the interannual variability of the ISMR (Goswami et al., 2006a; Pillai and Chowdary, 2016). The interannual  
30 variability of the ISMR is linked to many noted oscillations, the El Niño Southern Oscillation (ENSO), Indian Ocean Dipole  
(IOD), Atlantic Multidecadal Oscillation (AMO), Atlantic Zonal Mode (AZM), Pacific Decadal Oscillation (PDO), etc., (Nair  
et al., 2018; Sabeerali et al., 2019; Hrudaya et al., 2020). The oscillations thought to have the most significant impact on the  
ISMR are ENSO and IOD (Krishnaswami et al., 2015). Hence, in this study, we majorly focus on the individual and combined  
influences of the two climate modes ENSO and IOD on the ISMR interannual variability in observations, reanalysis data sets,  
35 and climate models.

ENSO is an important large-scale coupled atmosphere-ocean aperiodic oscillation over the Pacific ocean that on average  
occurs every 2–7 years. The Sea Surface Temperature (SST) pattern over western (central-eastern) tropical Pacific ocean  
experience large cold (warm) anomalies during the El Niño phase. The normal patterns of SST over the Pacific ocean are  
enhanced during the La Niña phase. These variabilities in the SST are coupled to the atmospheric Walker circulation, and Sir  
40 Gilbert Walker in 1924 was the first to observe a relation between ENSO and ISMR (Walker, 1924; Gadgil, 2003; Goswami,  
1998; Yun and Timmermann, 2018). He noticed that often the El Niño (La Niña) conditions over the Pacific ocean are linked to  
weak (strong) ISMR. During the El Niño conditions, the entire walker circulation is shifted eastwards by which the descending  
branch of the Walker cell on the western Indian ocean shifts eastward to overlie on the Indian subcontinent, thereby suppressing  
the convection (Walker, 1924; Krishna Kumar et al., 2006; Palmer et al., 2006). In the La Niña years, the entire Walker  
45 circulation shifts slightly westward, which assists in enhancing the convection over the Indian subcontinent. Many other studies  
(Goswami, 1998; Slingo and Annamalai, 2000) argued that the El Niño conditions do not suppress the ISMR directly through  
the descending branch of the Walker circulation but rather, the changes in the Walker circulation enhances the meridional  
Hadley circulation decent over the Indian subcontinent. Hence it could be that the ENSO affects the IMSR through interactions  
between the Walker and Hadley circulations.

50 Another important source that is linked to the ISMR interannual variability is a dipole like structure in the Indian ocean  
surface temperature known as IOD (Saji et al., 1999). During a positive (negative) IOD, the southeastern part of the Indian  
ocean is cooler (warmer) than normal while the western part of the Indian ocean is warmer (cooler). During the positive IOD  
event, the meridional circulation in the region is modulated through anomalous convergence patterns over the Bay of Bengal,  
thereby strengthening the monsoon with anomalous positive rainfall over the Indian subcontinent while the negative IOD events  
55 lead to the weakening of the rainfall (Ashok et al., 2001). Behera and Ratnam (2018) found that the opposite phases of IOD are  
associated with distinct regional asymmetries in IMSR anomalies over the Indian subcontinent contributing significantly to the  
interannual variability. Interestingly, Ashok et al. (2001) found that during the co-existence of El Niño and positive IOD, the  
IOD tends to compensate for the influence of El Niño leading to normal rainfall by inducing anomalous convergence over the

Bay of Bengal. Similarly, the negative IOD events can reduce the impact of La Niña on ISM rainfall and cause deficit monsoon rainfall. However, the study of Chowdary et al. (2015) showed that the local air–sea interaction in the tropical Indian ocean opposes the Pacific ocean impact even in the absence of IOD. Hence, still there are uncertainties associated with the individual and combined influence of ENSO and IOD on the interannual variability of ISMR.

Motivated by these large uncertainties in the present knowledge about how ENSO and IOD influence the ISMR interannual variability, we are investigating these connections from a two-source information exchange (IE) perspective. Shannon (1948) first introduced the concept of information entropy, which quantifies the average uncertainty of a given random variable. The IE between two subsystems  $X$  and  $Y$  can be understood as the average uncertainty reduction about  $X$  in knowing  $Y$  or vice versa. Recently, various methods from information theory have been widely used in the fields of earth system sciences (Bennett et al., 2019; Gerken et al., 2019; Jiang and Praveen, 2019; Ruddle et al., 2019), climate sciences (Nowack et al., 2020; Runge et al., 2020) and in other interdisciplinary sciences (Wibral et al., 2017; Leonardo et al., 2019; Shoaib Ahmad, 2018). The information theory, in its current form, provides a complete description of the IE relationship between a single-source and a target. However complex climate system often consist of multi-sources influencing a target such as the ENSO and IOD influencing the ISMR variability.

The IE in a system composed of two-source systems  $Y$  and  $Z$  to the target variable  $X$  is decomposed into four parts (Fig. 1) according to Williams and Beer (2010): (i) unique information shared by  $Y$  to  $X$  (ii) unique information shared by  $Z$  to  $X$  (iii) redundant information or overlapping information shared by both sources  $Y$  and  $Z$  together with  $X$  (iv) synergistic information about  $X$  while knowing  $Y$  and  $Z$  together but not either of them alone. An example of synergistic information from two sources is the classical binary exclusive-or (XOR) operation (Williams and Beer, 2010; James et al., 2016), where the two sources  $Y$  and  $Z$  provide information that is not available from either of their states alone but by jointly knowing their states together. Since ENSO and IOD are known to simultaneously influence the ISMR variability, one could expect the component of synergy or redundant information existing in this climate phenomenon. In the case of synergy, the target uncertainty of ISMR interannual variability is reduced only when the states of two sources, ENSO and IOD are known together but not individually. This decomposition of information is known as partial information decomposition (PID). Unfortunately, with the present standard methods available from information theory, one can not obtain the contributions of unique, synergy, and redundant information exchange metrics solely (Barrett, 2015). Here, we would like to bring to the attention of the readers that many interesting studies have come up with various definitions of these metrics (Williams and Beer, 2010; Griffith and Koch, 2014; Bertschinger et al., 2014; Finn and Lizer, 2018) and still, there has been no consensus among the scientific community for obtaining these metrics. A complete and consistent framework on quantifying the individual contributions of various terms in PID would make information theory a complete framework for understanding the information dynamics of multi-source systems. However, with the present available information theory methods, one can obtain a metric known as net synergy, which is synergistic information minus redundant information carried by the two sources  $Y$  and  $Z$  about the source  $X$ . More details of the formula of net synergy are described in the data and methodology section. It is very important to note that, though the methods from information theory are very useful in analyzing the complex system behavior, their estimations are quite challenging due to their sensitivity to free tuning parameters and sample size (Knuth et al.,

2013; Smirnov Dmitry, 2013; Pothapakula et al., 2019). Hence, this study follows and uses various estimators we proposed in  
95 our earlier work (Pothapakula et al., 2019) for robustness in the results.

Here we are investigating the information exchange from ENSO and IOD to the IMSR interannual variability by using  
available observations, reanalysis data sets, and climate models. However, before exploring the two-source IE from the ENSO  
and IOD to IMSR variability, we first demonstrate the concept of two-source IE with results from a simple idealized linear and  
non-linear dynamical models for better understanding. We also use various estimators of IE, for example, Linear, Kraskov, and  
100 Kernel estimators for robustness. Then, the two-source IE concept is applied to observations and reanalysis data sets. This helps  
in understanding the IE dynamics of ENSO and IOD to the interannual variability of IMSR in the natural system. Thereafter, we  
investigate if the two-source information exchange dynamics of ENSO and IOD to ISMR interannual variability is replicated  
in three different global climate models (GCM) simulations from the 5th phase of the Coupled Model Intercomparison Project  
(CMIP5). Since it is well known that GCMs due to their low spatial resolution do not resolve all the subgrid-scale phenomena,  
105 we have used dynamical downscaling of the three GCM simulations with an RCM to obtain higher resolution details (Bhaskaran  
et al., 2012; Chowdary et al., 2018; Dobler and Ahrens, 2011; Asharaf and Ahrens, 2015; Lucas-Picher et al., 2011). The RCM  
simulations are performed with a horizontal resolution of 25km ( $\sim 0.22$ ) and follow the framework of coordinated regional  
downscaling experiments (CORDEX) (Giorgi et al., 2009; Gutowski et al., 2016). By employing the two-source IE from  
the ENSO and IOD to the ISMR interannual variability on both the driving GCM simulations and the downscaled RCM  
110 simulations, we can evaluate the performance of the model chain. To our knowledge, this is a first of its kind evaluation study  
of GCM simulations and RCM simulations with information theory methods from the two-source IE viewpoint.

This paper is organized as follows. In Section 2 we explain briefly the information theory methods and estimators used in this  
study followed by a brief discussion about the idealized linear and non-linear dynamical systems. In Section 3 observational  
and reanalysis data, various GCMs in CMIP5 used in this study, and the RCM model used in dynamically downscaling the  
115 GCM simulations are discussed. In Section 4, the results obtained from idealized systems and model evaluation are shown  
along with a detailed discussion. Finally, conclusions are drawn in Section 5.

## 2 The theory of information exchange

Shannon (1948) introduced the concept of information entropy, which quantifies the average uncertainty of a given random  
variable. Recently, various methods from information theory have been widely used in the fields of earth system sciences  
(Bennett et al., 2019; Gerken et al., 2019; Jiang and Praveen, 2019; Ruddel et al., 2019), climate sciences (Nowack et al., 2020; Runge et al.,  
120 in other interdisciplinary sciences (Wibral et al., 2017; Leonardo et al., 2019; Shoib Ahmad, 2018). This section comprises of  
the basic concepts of information theory along with a brief introduction of various estimators. Also, a description of the ideal-  
ized systems used in this study is covered.

## 2.1 Concepts from Information Theory

125 The Shannon entropy (Shannon, 1948) of a random variable  $X$ , quantifies the amount of uncertainty contained in it and is defined by

$$H(X) = - \sum_x p(x) \log p(x),$$

where  $p(x)$  is the probability of a discrete state of the random variable  $X$ . The summation goes through all states of the random variable  $X$ . The units of entropy are expressed in nats if a natural logarithm is applied (in bits when the logarithm base is 2).

130 Mutual information (MI) quantifies the reduction in the uncertainty of one random variable given knowledge of another variable (Cover and Thomas, 1991) and is defined by

$$I(X; Y) = \sum_{x,y} p(x,y) \log \frac{p(x,y)}{p(x)p(y)},$$

where  $p(x,y)$  is the joint distribution of variables  $X$  and  $Y$ , and  $p(x)$ ,  $p(y)$  are the marginal distributions of  $X$  and  $Y$ , respectively.

Mutual information between two sources  $Y$  and  $Z$  and a target  $X$  is given as

$$I(X; Y, Z) = \sum_{x,y,z} p(x,y,z) \log \frac{p(x,y,z)}{p(x)p(y,z)},$$

135 where  $p(x,y,z)$  is the joint distribution of variables  $X, Y$  and  $Z$ , and  $p(x)$ ,  $p(y,z)$  are the marginal probabilities. Furthermore, the information  $I(X; Y, Z)$  that the two sources share with target should decompose according to partial information decomposition by Williams and Beer (2010) into four parts (Fig. 1) as

$$I(X; Y, Z) = U(X; Y|Z) + U(X; Z|Y) + R(X; Y, Z) + S(X; Y, Z), \quad (1)$$

140 where  $U(X; Y|Z)$  is the unique information shared by  $Y$  to  $X$ ,  $U(X; Z|Y)$  is the unique information shared by  $Z$  to  $X$ ,  $R(X; Y, Z)$  redundant information shared by both sources  $Y$  and  $Z$  together with  $X$ , and  $S(X; Y, Z)$  synergistic information about  $X$  while knowing the states of  $Y$  and  $Z$  together.

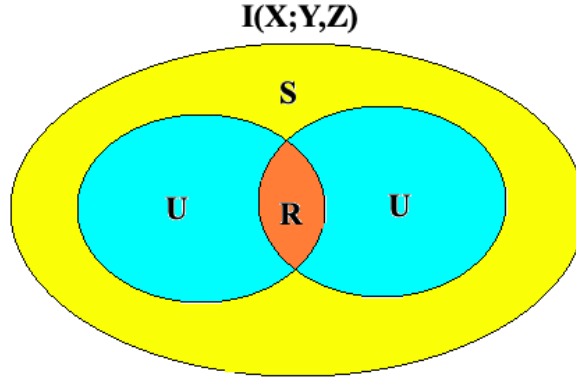

**Figure 1.** Information exchange from two sources  $Y, Z$  to the target  $X$  decomposed according to PID as unique information (U), redundant information (R) and synergistic information (S)

In the case of two sources influencing the target, the mutual information shared by a single source to the target is given by

$$\begin{aligned} I(X;Y) &= U(X;Y|Z) + R(X;Y,Z), \\ I(X;Z) &= U(X;Z|Y) + R(X;Y,Z). \end{aligned} \tag{2}$$

From the current information theory framework, the quantities  $I(X;Y,Z)$ ,  $I(X;Y)$ ,  $I(X;Z)$  can be straightforwardly computed. ~~However, there are still ongoing debates about quantifying unique information, redundant information, and synergistic information.~~ Unfortunately, with the present standard methods available from information theory, one can not obtain the contributions of unique, synergy, and redundant information exchange metrics solely (Barrett, 2015). Here, we would like to bring to the attention of the readers that many interesting studies have come up with various definitions of these metrics (Williams and Beer, 2010; Griffith and Koch, 2014; Bertschinger et al., 2014; Finn and Lizer, 2018) and still, there has been no consensus among the scientific community for obtaining these metrics. A complete and consistent framework on quantifying the individual contributions of various terms in PID would make information theory a complete framework for understanding the information dynamics of multi-source systems.

According to Barrett (2015), one can obtain a quantity known as net synergy from Eq.1 and Eq.2 as

$$\begin{aligned} \Delta I(X;Y,Z) &= I(X;Y,Z) - I(X;Y) - I(X;Z), \\ &= S(X;Y,Z) - R(X;Y,Z). \end{aligned} \tag{3}$$

When  $\Delta I(X;Y,Z) > 0$ , synergistic information from two sources is greater than redundant information and vice versa. The  $\Delta I$  provides a lowerbound for synergistic/redundant information. From here on, if  $\Delta I(X;Y,Z) > 0$  we refer as net synergistic information and if  $\Delta I(X;Y,Z) < 0$  we refer to as net redundant information.

## 2.2 Estimation techniques

Though the information theory methods are very useful in assessing the behavior of dynamical systems, their estimation is  
 160 challenging. Hence, in this study, we implemented various estimators for robustness in our results.

### 2.2.1 Estimation under linear approximation (Linear estimator)

Here we will briefly introduce the basic concepts for estimation of the two-source IE under linear approximation. For a detailed  
 explanation of the concept, we are referring the reader to Barrett (2015).

The entropy for a continuous random variable  $X$  under linear approximation is given as

$$165 \quad H(X) = \frac{1}{2} \log[\det \Sigma(X)] + \frac{1}{2} m \log(2\pi e),$$

where  $m$  is the dimension of random variable  $X$ ,  $\Sigma(X)$  is the  $m \times m$  matrix covariances i.e.,  $\text{cov}(X^i, X^j)$ .

Following Barrett (2015), the partial covariance of  $X$  with respect to  $Y$  is given as

$$\Sigma(X|Y) = \Sigma(X) - \Sigma(X, Y)\Sigma(Y)^{-1}\Sigma(Y, X).$$

From then the conditional entropy can be derived as

$$H(X|Y) = \frac{1}{2} \log[\det \Sigma(X|Y)] + \frac{1}{2} m \log(2\pi e).$$

The mutual information  $I(X; Y)$  is the difference between  $H(X)$  and  $H(X|Y)$ ,

$$I(X; Y) = \frac{1}{2} \log \left[ \frac{\det \Sigma(X)}{\det \Sigma(X|Y)} \right].$$

For a general three dimensional jointly Gaussian system  $(X, Y, Z)^T$ , and by setting zero mean and unit variance, the covari-  
 ance matrix is given by,

$$170 \quad \Sigma = \begin{bmatrix} 1 & a & c \\ a & 1 & b \\ c & b & 1 \end{bmatrix}$$

Thus, from the above matrix, the mutual information is given as

$$I(X; Y) = \frac{1}{2} \log \left( \frac{1}{1 - a^2} \right),$$

$$I(X; Z) = \frac{1}{2} \log \left( \frac{1}{1 - c^2} \right),$$

$$I(X; Y, Z) = \frac{1}{2} \log \left( \frac{1 - b^2}{1 - (a^2 + b^2 + c^2) + 2abc} \right).$$

The net synergy can be obtained by  $I(X; Y, Z) - I(X; Y) - I(X; Z)$ , given as

$$\Delta I(X; Y, Z) = \frac{1}{2} \log \left( \frac{(1 - a^2)(1 - b^2)(1 - c^2)}{1 - (a^2 + b^2 + c^2) + 2abc} \right).$$

### 2.2.2 Estimation through box step kernel (Kernel estimator)

The estimation of non-linear entropy and mutual information estimators contains Probability Density Functions (PDFs). The uni-variate and bi-variate PDFs for continuous data can be estimated through various available discretization methods (e.g.,  
 175 binning, kernel etc). Here we use a simple box step kernel  $\Theta$  with  $\Theta(x > 0) = 0$  and  $\Theta(x < 0) = 1$  for the estimation of relevant joint probability distributions (e.g.,  $\hat{p}(x, y)$ ,  $\hat{p}(x)$  and  $\hat{p}(y)$ ). For example, the joint probability distribution  $\hat{p}(x, y)$  is calculated as

$$\hat{p}_r(x_n, y_n) = \frac{1}{N} \sum_{n'=1}^N \Theta(|(x_n - x_{n'}), (y_n - y_{n'})| - r),$$

where the norm corresponds to the maximum distance in the joint space and  $r$  is the kernel width. Similarly one can estimate  
 180 the PDF for high dimensional systems for the estimation of MI. For more details into the estimator, refer to Kantz and Schreiber (1997); Goodwell and Kumar (2017) and information-theoretic toolkit from Lizier (2014).

### 2.2.3 Estimation through k-nearest neighbor (Kruskoff estimator)

The k-nearest neighbor estimator uses an adaptive binning strategy by estimating the average distances to the k-nearest neighbor data points. For example, the MI can be computed as

$$185 \quad I(X; Y) = \Psi(k) - \langle \Psi(n_x + 1) + \Psi(n_y + 1) \rangle + \Psi(N),$$

where  $N$  is total number of points,  $n_x$  and  $n_y$  are the number of points that fall in the marginal spaces of  $X$  and  $Y$  respectively within the distance taken as  $d = \max(|x - x'|, |y - y'|)$  and  $\Psi$  denotes the digamma function. For more details refer to Kruskoff et al. (2004). Similarly, the equation mentioned above can be extended to higher dimensional estimation of MI. From hereafter, the estimation through k-nearest neighbor is called as Kruskoff estimator.

## 190 2.3 Idealized systems for demonstration

Before we apply information theory estimators to two-source information exchange in climate applications, we consider idealized linear and non-linear systems as given in the following sub-sections to demonstrate the concept of two-source IE.

### 2.3.1 Linear autoregressive systems

Often in climate systems, the future state prediction of a variable relies on the past of its own state (persistence) or from  
 195 past of another variable (Runge et al., 2014), or from the linear/non-linear combination of both (possible case of net synergy/redundancy). Hence, as a first case of demonstration, we considered a two-dimensional linear system (Barrett, 2015)  $x$



and  $y$ , with  $x$  receiving information from its immediate past and from the immediate past of  $y$  with the following governing equations:

$$\begin{aligned}x_t &= \alpha x_{t-1} + \alpha y_{t-1} + \mathcal{N}_x(0, 1), \\y_t &= \mathcal{N}_y(0, 1),\end{aligned}\tag{4}$$

200 where  $\alpha$  is the coupling coefficient varied from 0 to 0.8 with an increment of 0.1 and  $\mathcal{N}(0, 1)$  is Gaussian noise with zero mean and unit variance. The system was initialized with  $(x_0 = 0)$  and is integrated around 100,000 iterations. For the analysis of two-source IE with various estimators, we use the last 5000 time units from the available time series.

In the first example, we considered IE from two sources (one source being the persistence) contributing to the target prediction, however not all predictions of target depend on two sources simultaneously (i.e., net synergy/redundancy do not exist),  
205 hence as a second case, we considered a system consisting of two subsystems which are coupled with each other but only having a single source with the governing equations

$$\begin{aligned}x_t &= \alpha y_{t-1} + \mathcal{N}_x(0, 1), \\y_t &= \alpha x_{t-1} + \mathcal{N}_y(0, 1),\end{aligned}\tag{5}$$

with  $\alpha$  being the coupling coefficient. We followed similar steps for integration as in the previous linear system.

Finally as third example, we test a three-dimensional system in which two individual sub-systems contribute to the evolution  
210 of third system such as the ENSO and IOD, as two individual systems contributing to the interannual variability of the ISMR. This system has the governing equations

$$\begin{aligned}x_t &= \alpha y_{t-1} + \alpha z_{t-1} + \mathcal{N}_x(0, 1), \\y_t &= \mathcal{N}_y(0, 1), \\z_t &= \mathcal{N}_z(0, 1),\end{aligned}\tag{6}$$

where system  $y$  and  $z$  are two individual sub-systems exchanging information to the target system  $x$ .

### 2.3.2 Non-linear Heñon system

215 ~~As the climate system is~~ We also extended our analysis to a non-linear ~~, we further extend our analysis from idealized linear systems to a idealized non-linear system. For this purpose, we considered coupled Heñon maps which captures the stretching and folding dynamics of chaotic systems such as the Lorenz system which mimic's the atmospheric behavior. We considered two Heñon maps (Kraskovska, 2019),  $x$  and  $y$  coupled with each other with the governing equations where the coupling coefficients  $C \in [0, 0.6]$ . From Eq.A1 it is evident that the system  $x$  is driving system  $y$  through coupling coefficient  $C$ .~~ system described in the Appendix section.  
220

### 3 Data and climate models

In this section, we will discuss various observational and reanalysis data sets used to quantify the two-source IE from ENSO and IOD to ISMR interannual variability in the natural system. Furthermore, the details of various GCM and RCM simulations used in this study are also covered.

#### 225 3.1 Observational, reanalysis data sets and climate simulations

We are focusing on the South Asian Summer Monsoon seasons, starting from June and ending in September (June- July-August-September: JJAS), thus monthly data sets for JJAS for the time period 1951-2005 from observations and model simulations are used in this study. Various observational, reanalysis data sets and model simulations used to quantify the two-source IE from the ENSO and IOD to the ISMR interannual variability are listed in Table 1 and are also described here.

##### 230 3.1.1 Observational, reanalysis data sets and indices

The UK Met Office's Hadley Centre Sea Ice and Sea Surface Temperature dataset (HadISST 1.1) (Rayner et al., 2002) is used to retrieve SST information for the Indian and the Pacific ocean. Monthly precipitation fields from Global Precipitation Climatology Centre (GPCC) (Schneider et al., 2008) is used as precipitation observational record together with a high-resolution data set, covering only the monsoon south Asia domain, namely the Asian Precipitation - Highly-Resolved Observational Data Integration Towards Evaluation (APHRODITE) monthly accumulated precipitation (Akiyo et al., 2012). The rainfall, winds, and specific humidity are taken from the National Center for Environmental Prediction-National Center for Atmospheric Research (NCEP-NCAR) reanalysis data set (Kalnay et al., 1996). The ENSO and IOD indices are obtained from the National Oceanic and Atmospheric Administration Earth System Research Laboratories (NOAA ESRL) and Japan Agency for Marine-Earth Science and Technology (JAMSTEC) for validation of PCs derived from the observational SST data sets, i.e., the HadISST, and  
235 NCEP reanalysis SST. In addition to the above-mentioned data sets, we also used ERA-Interim (Dee et al., 2011) and MERRA (Rienecker et al., 2011) reanalysis rainfall datasets (1980-2005) as additional resources.  
240

##### 3.1.2 Global and regional climate simulations

The three CMIP5 GCMs (details in Table. 1), the MPI-ESM-LR (Stevens et al., 2017), Nor-ESM-M (Bentsen et al., 2012) and EC-EARTH (Hazeleger et al., 2010) were dynamical downscaled with the non-hydrostatic regional climate model COSMO-crCLM version v1-1. The COSMO-crCLIM is an accelerated version of the COSMO model (Fuhrer et al., 2014) in climate mode (Leutwyler et al., 2016; Rockel et al., 2008). A two-stream radiative transfer calculations are based on Ritter and Geleyn (1992), the convection is parameterized by Tiedtke (1989), the turbulent surface energy transfer and planetary boundary layer are using the parametrization of Raschendorfer (2001), and precipitation is based on a four-category microphysics scheme that includes cloud, rainwater, snow, and ice (Doms et al., 2011). The soil-vegetation-atmosphere-transfer is using the TERRA-ML (Schrodin and Heise, 2002), however, this current version is employing a modified groundwater formulation (Schlemmer et al., 2018). The RCM simulation has a horizontal resolution of  $0.22^\circ$  (i.e., 25km) and with 57 vertical levels and is using  
245  
250

**Table 1.** CMIP5–GCMs/RCM/observations descriptions used in the current study.

| <b>GCM Modeling center</b>                   | <b>Acronym</b> | <b>Ensemble member</b> | <b>Atm.Resolution</b>            |
|----------------------------------------------|----------------|------------------------|----------------------------------|
| Max Planck Institute for Meteorology         | MPI-ESM-LR     | r1i1p1                 | $1.875^\circ \times 1.875^\circ$ |
| Norwegian Climate Centre                     | Nor-ESM-M      | r1i1p1                 | $2.5^\circ \times 1.9^\circ$     |
| SMHI, Sweden                                 | EC-EARTH       | r12i1p1                | $1.125^\circ \times 1.125^\circ$ |
| <b>RCM Modeling center</b>                   |                |                        |                                  |
| CLMCom-ETH                                   | COSMO-crCLIM   |                        | $0.22^\circ \times 0.22^\circ$   |
| <b>Observations and Reanalysis data sets</b> |                |                        |                                  |
| APHRODITE                                    | –              | –                      | $0.25^\circ \times 0.25^\circ$   |
| GPCC                                         | –              | –                      | $0.5^\circ \times 0.5^\circ$     |
| HadISST                                      | –              | –                      | $1^\circ \times 1^\circ$         |
| NCEP Reanalysis                              | –              | –                      | $1.875^\circ \times 1.875^\circ$ |
| ERA-Interim Reanalysis                       | –              | –                      | $0.5^\circ \times 0.5^\circ$     |
| MERRA Reanalysis                             | –              | –                      | $0.5^\circ \times 0.65^\circ$    |

a time step of 150s. The model simulation configuration is following the CORDEX framework, meaning that a historical period is simulated from 1950-2005, and the business as usual future emission scenario (RCP8.5) is simulated from 2006-2099. However, here we are only looking into the historical period. It is to be noted that for the analysis of rainfall anomaly composites, moisture anomalies, and IE plots, the GCM and RCM simulations are interpolated to a common observational grid (a grid with  $0.25^\circ$ ). Our interpretation of results does not change much with the original resolution of the datasets.

## 4 Results and discussion

In the current section, first, we discuss the results of two-source IE obtained from various idealized linear and non-linear dynamical systems mentioned in Section 2. Thereafter, we present results of two-source IE in the climate system with the observations, reanalysis data sets, GCM simulations, and the RCM simulations.

### 4.1 Applications to idealized systems

First, we will start with the discussion of results obtained from idealized systems with various IE estimators.

### 4.1.1 Linear autoregressive system

Figure 2 shows the information exchange (in nats) from  $y_{t-1}$  (immediate past of  $y$ ) to  $x_t$  (present of  $x$ ) and also from  $x$  immediate past to present of  $x$  (i.e.,  $x_{t-1}$  to  $x_t$ ), for the system with Equation 4. The two-source mutual information linear estimator shows that as the coupling coefficient increases, the IE from  $I(x_t; y_{t-1}, x_{t-1})$  increases, indicating that the immediate pasts of  $x_{t-1}$  and  $y_{t-1}$  exchange information to the future state of  $x$  as expected from the system dynamics. Also, as expected the  $I(x_t; y_{t-1}, x_{t-1}) > I(x_t; y_{t-1})$  or  $I(x_t; x_{t-1})$ , indicating that the two-source IE dominates the dynamics of this system. The IE from the immediate past of  $x$  i.e.,  $x_{t-1}$  is a stronger source of information to the target  $x_t$  due to self feedback/large persistence and  $y_{t-1}$  is a weaker source to the target  $x_t$  (this behavior is often observed in the climate system where persistence/self feedback plays an important role (Runge et al., 2014). The error bars represents two standard deviations of the 100 permuted surrogates showing the measure of uncertainty for the IE estimations. Furthermore there exists a significant positive net synergy ( $\Delta I$ ) indicating that the two sources at higher couplings exchange synergistic information to the target even though the two sources  $y_{t-1}$  and  $x_{t-1}$  are uncorrelated with each other, in other words, a certain degree of uncertainty about the system  $x_t$  is reduced by knowing the state of  $x_{t-1}$  and  $y_{t-1}$  together. Here in this system, the synergy between the two sources ( $y_{t-1}$  and  $x_{t-1}$ ) to the prediction of target ( $x_t$ ) might be arising from their linear combination. This shows that linear systems can exhibit synergies, which is also shown analytically in the work by Barrett (2015). The non-linear estimators, i.e., Kraskov estimator (40 k-nearest neighbors) and Kernel estimator (1.5 kernel width) also show the similar system behavior. The free parameters i.e., kernel width (1–2 kernel widths) and number of k-nearest neighbors (20–60 neighbors) are tested and tuned for consistent and robust results.

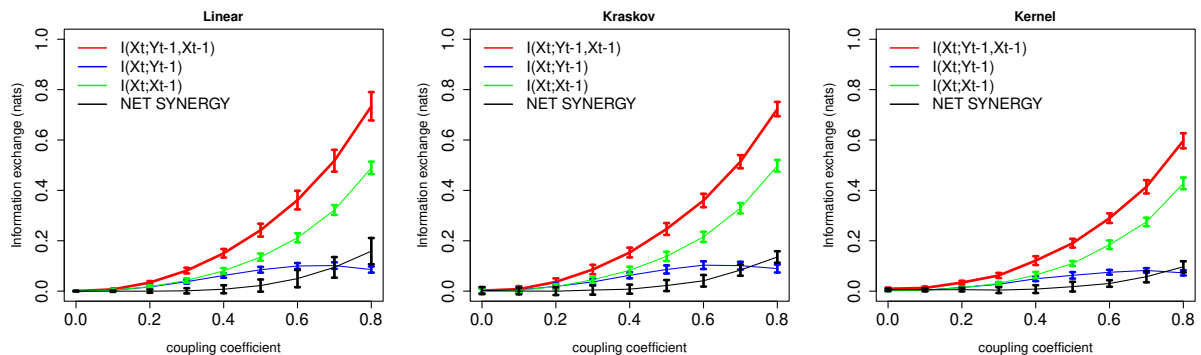

**Figure 2.** Information exchange in nats from two-source (red line), single source (green and blue lines), and net synergy (black line) to the target with Linear, Kraskov and Kernel estimators. The error bars represents two standard deviations of the 100 permuted samples.

Next, we tested another system consisting of two subsystems, coupled with each other but only having a single source as in Equation 5. From Fig. S1 (in supplementary material), the MI linear metrics shows that  $I(x_t; y_{t-1}) = I(x_t; y_{t-1}, x_{t-1})$  indicating that the immediate pasts of  $x_{t-1}$  does not contribute to IE for the target  $x_t$ . The net synergy from  $y_{t-1}, x_{t-1}$  to the target  $x_t$  is as expected zero. The IE from  $y_{t-1}$  to  $x_t$  increases as the coupling coefficient increases, which is also expected. This

285 is also seen in Kraskov estimator (40 k-nearest neighbors) and Kernel estimator (1.5 kernel width). The free tuning parameters are tested and tuned for consistent results. Finally, among the linear systems, we tested a three-dimensional system (similar to the situation of ENSO, IOD influencing ISMR variability) with the Equation 6. Figure S2 shows that the information exchange from  $I(x_t; y_{t-1}) = I(x_t; z_{t-1})$  indicating that the two sources contribute to the target system equally and moreover the IE increases with increase with coupling coefficient. This behavior is expected as observed from the governing equations. Even  
290 though the two sources are uncorrelated with each other, they exhibit positive net synergy. The similar behavior in the system is seen with non-linear Kernel estimator (1.5 kernel width) and Kraskov estimator (40 k-nearest neighbors). The free parameters are tested and tuned for consistent results.

#### 4.1.2 Non-linear Hénon system

~~Figure A1 shows the information exchange in the~~ The results for non-linear Hénon system (equations given as in Equation A1). Figure A1 shows that the IE,  $I(y_t; x_{t-1})$  increases as the coupling coefficient  $C$  increases. It can be also observed that the opposite behavior i.e., information exchange from  $I(y_t; y_{t-1})$  decreases with increasing  $C$  due to the term  $(1-C)y_{t-1}^2$  in Eq. 4. Also the IE from  $I(y_t; y_{t-1}) > I(y_t; x_{t-1})$  indicating that the target is tightly coupled with its own past (also seen in governing equations). In this case, the two-source IE is greater than  $I(y_t; y_{t-1})$  or  $I(y_t; x_{t-1})$  as expected, this is because both the sources are contributing to the target future state. Here the correlation between the two sources  $x_{t-1}$  and  $y_{t-1}$  is  
300 almost equal to zero. The net synergy increases with increase in the coupling coefficient indicating net synergistic IE by the two sources. For this system we used 8 number of k-nearest neighbors for Kraskov estimator and 0.5 kernel width for Kernel estimator. system are discussed in Appendix section.

~~Information exchange in nats from two source (red line), single source (green and blue lines), net synergy (black line) to target for Kraskov and Kernel estimators. The error bars represents two standard deviations of the 100 permuted samples.~~

305 The above mentioned idealized linear and non-linear examples show that some systems do exhibit positive net synergy from two-sources to target for both linear as well as non-linear systems, even when the two sources are uncorrelated. Furthermore, all the three estimators mentioned above i.e., Linear, Kernel and Kraskov estimators are able to detect consistently the two-source information exchange.

## 4.2 Application of dual-source IE to climate phenomenon

310 In this section, we examine the two-source IE from ENSO, IOD to the interannual variability of ISMR. Foremost, we present results obtained from the observational, reanalysis data sets and then extend our analysis of two-source IE to three GCM simulations as mentioned in Table. 1. Thereafter, we present results from our dynamically downscaled simulations with COSMO-crCLM with the three GCMs as driving models.

### 4.2.1 Observation and reanalysis data

315 In the observations and reanalysis data sets, empirical orthogonal function (EOF) analysis of the detrended SST anomalies is performed over the tropical Indian ocean ( $25^{\circ}\text{S}$ – $20^{\circ}\text{N}$ ,  $50$ – $120^{\circ}\text{E}$ ) and the tropical Pacific ocean ( $25^{\circ}\text{S}$ – $25^{\circ}\text{N}$ ,  $120^{\circ}\text{E}$ – $80^{\circ}\text{W}$ ) to obtain the major oscillations and their respective PCs. The ENSO and IOD indices are taken as the time series associated with their respective PCs obtained from the EOF spatial patterns replicating them. Figure 3 shows the second EOF patterns of the SST anomalies over the Indian ocean and first EOF patterns over the Pacific ocean for HadISST and from NCEP reanalysis.

320 From the two SST data sets, it is observed that both ENSO and IOD like structures are captured with the second EOF and the first EOF patterns i.e., a zonal dipole like structure in the Indian ocean and the Pacific ocean respectively. We use EOF analysis as opposed to standard indices such as the dipole mode index known as DMI (Saji et al., 1999) and Niño-3.4 to allow each model to exhibit their own patterns as opposed to an imposed structure (Saji et al., 2006; Cai et al., 2009a, b; Liu et al., 2011).

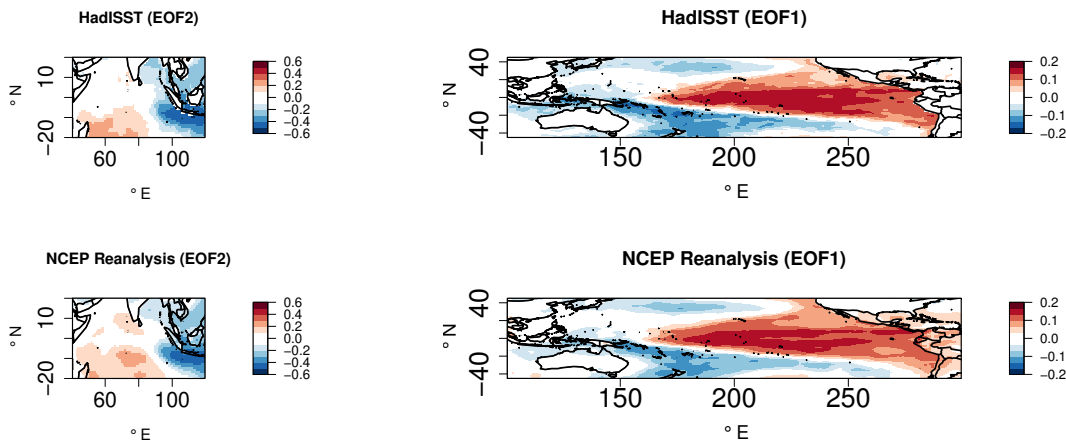

**Figure 3.** EOF2 patterns of SST anomalies (JJAS) in the Indian ocean and EOF1 patterns in the Pacific ocean for observed HadISST and NCEP reanalysis.

To ensure that the EOF patterns in the observed SST data sets replicate the ENSO and IOD modes, the obtained PCs are compared against the corresponding Niño 3.4 and IOD index obtained from the NOAA ESRL Physical Sciences Division, and JAMSTEC observations (shown in Figure S3). These indices are widely used in several studies concerning the IOD and Niño 3.4 teleconnections. The percentage of the total variance contributed by the first 20 EOFs from the Indian and Pacific ocean SST anomalies for the seasons JJAS are also shown in Figure S3. The linear fit between the Indian ocean PCs of EOF-2 obtained from the HadISST against the observed IOD index has a correlation of about 0.78, and the correlation of NCEP reanalysis SST with the observed IOD index is 0.77. These results are significant at a 99 % confidence level. This indicates that the EOF2 replicates the IOD like variability for the two mentioned datasets. The percentage of the total variability contributed by the EOF1 of the Indian ocean is about 30% which is associated with the basin-scale anomalies of uniform polarity in the Indian ocean associated with the ENSO events. The dipole mode (EOF2) explains about 15% of the total variance which is

330

associated with the IOD. Our results for the Indian ocean EOF patterns and their respective contribution to the total variance are consistent with the study by Saji et al. (1999). Similarly, the PCs associated with the first EOF over the Pacific ocean are highly correlated against the observed Niño 3.4 index with a correlation value greater than 0.8 for both data sets indicating that the EOF1 captures the ENSO like variability. The percentage of total variance contributed by the first EOF  $\approx 20\%$  is also consistent with the ENSO literature.

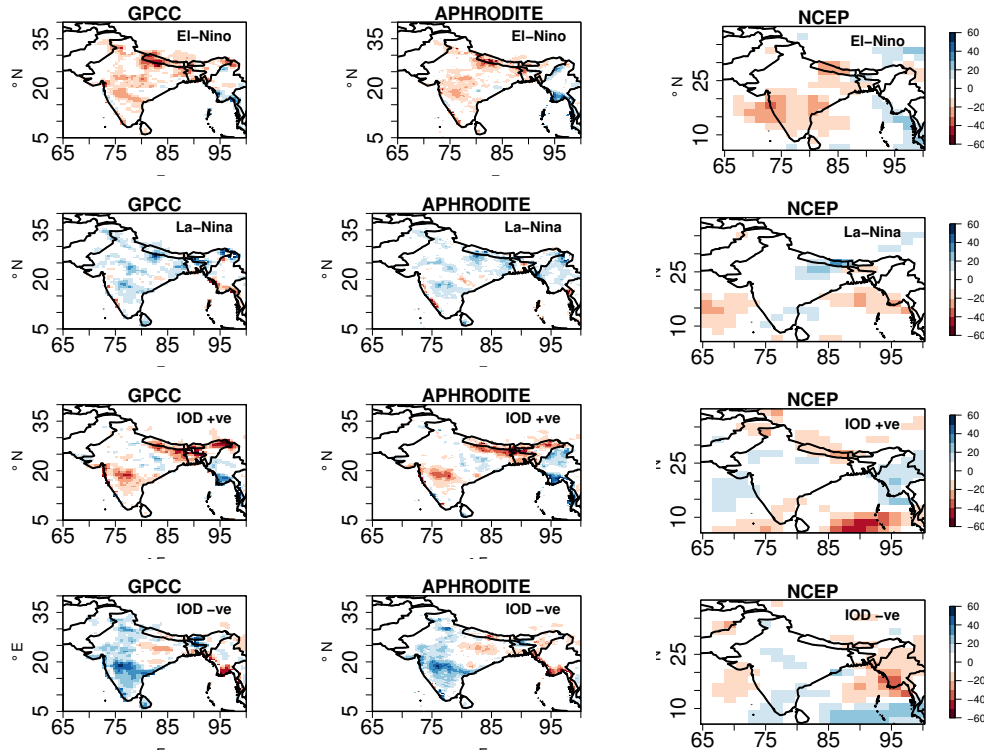

**Figure 4.** Total precipitation anomaly (mm/month) composites (JJAS) over the Indian subcontinent for El-Niño, La-Niña, positive IOD and negative IOD events observed in GPCC, APHRODITE and NCEP reanalysis data sets for the period of 1951-2005

The ENSO and IOD are known to influence the ISMR distribution across the Indian subcontinent. Hence to investigate the rainfall anomaly distribution during various phases of ENSO and IOD (i.e., El-Niño, La-Niña, IOD +ve, and IOD-ve), we plotted the anomaly composite figures ( Fig. 4 ) for the ISMR during these events. The anomalies are constructed by subtracting the Indian subcontinent climatology mean JJAS rainfall with the rainfall months associated with various phases of IOD and ENSO. The anomaly composites with El-Niño (La-Niña) events show that most parts of Indian subcontinent receive less (more) rainfall during the El-Niño (La-Niña) phases. This behavior can be attributed to the suppression of convection over the Indian subcontinent during the El-Niño phase through the zonal and meridional circulation and vice-versa during La-Niña phase. The rainfall anomaly composites associated with the positive and negative phases of the IOD represent distinct regional asymmetric rainfall anomalies i.e., a meridional tripolar pattern, with above than normal rainfall in central parts of India and below than normal rainfall to the north and south of it. Conversely, the negative IOD is associated with a zonal dipole having

above (below) normal rainfall on the western (eastern) half of the Indian subcontinent. These results with rainfall composites  
 350 during IOD phases are consistent with Behera and Ratnam (2018), where it was concluded that these rainfall anomaly patterns  
 are due to the differences in the atmospheric responses and the associated differences in moisture transports to the region during  
 contrasting phases of the IOD. Hence, Fig. 4 indicates that both ENSO and IOD contribute to the interannual variability of the  
 IMSR.

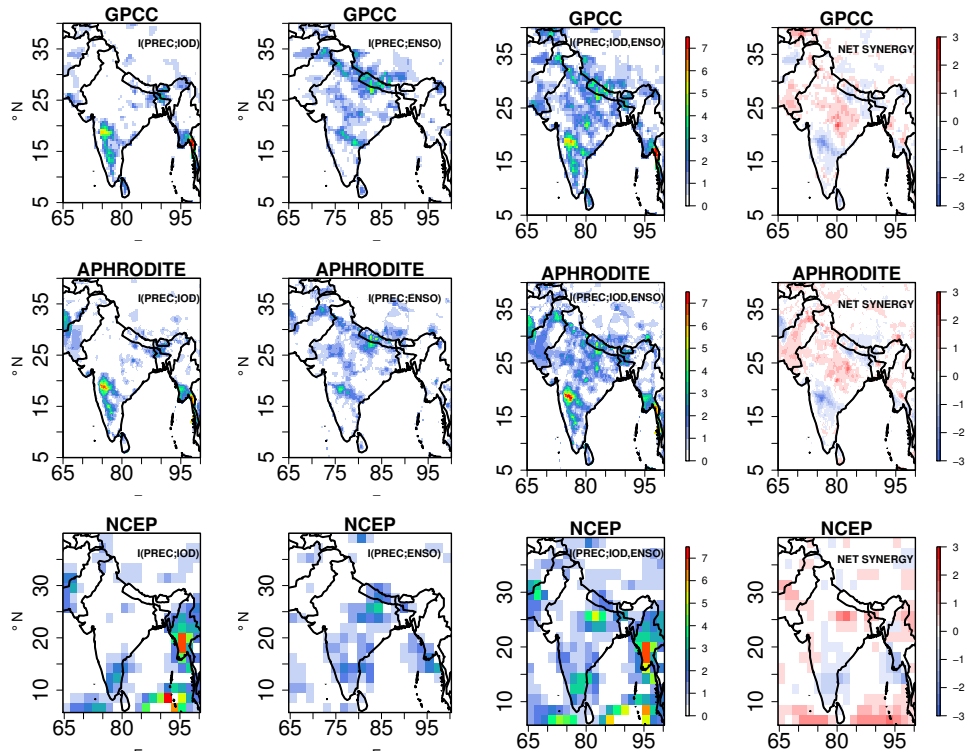

**Figure 5.** Information exchange from  $I(PREC; IOD)$ ,  $I(PREC; ENSO)$ , two-source information exchange  $I(PREC; ENSO, IOD)$  and  $NET\ SYNERGY \times 10^{-2}$  nats for observational data sets GPCC, APHRODITE and NCEP reanalysis. Only significant values at 95% confidence intervals are plotted.

Figure 5 represents the IE from the IOD to precipitation i.e.,  $I(PREC; IOD)$ , ENSO to precipitation i.e.,  $I(PREC; ENSO)$ ,  
 355 the two-source IE i.e.,  $I(PREC; IOD, ENSO)$  together with the  $NET\ SYNERGY$  for the observations GPCC, APHRODITE,  
 and the NCEP reanalysis data sets under linear approximation. We chose various precipitation data sets to accommodate un-  
 certainties due to the sparse data networks, especially in regions with complex topography. The observed IE from IOD to total  
 precipitation i.e.,  $I(PREC; IOD)$  shows that the IOD transmits information to the southwest sector of the Indian subcontinent  
 especially the lee-ward side of the western ghat regions in GPCC and APHRODITE data sets. This feature is slightly shifted  
 360 to the east in the NCEP reanalysis data sets. All the IE plotted values are significant at 95% confidence level obtained from  
 100 surrogate samples. Some regions in the northeast sector also are influenced by the IE from IOD which is replicated in all  
 three observational data sets. It is interesting to note that the location at which the IE from IOD to the precipitation over the



Indian subcontinent matches the significant rainfall anomalies shown in Fig. 4. The  $I(PREC; ENSO)$  shows that the northern parts of the Himalayas, central India receive information from the Pacific ocean in all the three data sets, this also matches the anomaly locations shown in Fig. 4. The two-source information exchange covers most parts of the Indian subcontinent indicating that both ENSO and IOD contribute to the ISMR during JJAS seasons. Also, interestingly from the NET SYNERGY plot, a positive net synergy over certain parts of central India also known as monsoon core region is observed, indicating that both ENSO and IOD synergistically contribute to the interannual variability of ISMR. Furthermore, the ENSO and IOD share net redundant information (negative net synergy) in the southern sector of the Indian sub-continent. The Kraskov estimator (Fig. S4) and the Kernel estimator (~~figure not shown~~ Fig. S5) also show similar IE patterns over the Indian subcontinent with 30 k-nearest neighbors for Kraskov and 0.5 kernel width for Kernel estimators (free parameters are tested and tuned for consistent results). In addition, we also checked the two-source IE patterns in the two reanalysis datasets, MERRA and ERA-Interim (1980-2005), shown in Fig. S5-S6 and Fig. S6-S7. It is found that in both the data sets, similar IE patterns are replicated i.e., positive net synergy in central India and net redundant information in southern part of the Indian subcontinent. We also tested our estimators during the DJFM months, the synergy from IOD and ENSO to the IMSR is absent.

The net synergy between the ENSO and IOD to the ISMR interannual variability indicates that the central India monsoon rainfall predictability lies in knowing the states of ENSO and IOD together than by knowing the states of ENSO and IOD individually (similar to the idealized test case of example 3). This is also exactly similar to the XOR logic gate, where the uncertainty of the output is known only with the simultaneous knowledge of the two input states. To understand the information synergy physically, we show the moisture transport figures from the NCEP reanalysis datasets for various phases of ENSO and IOD during the JJAS. From Fig. 6 it is observed that the anomalous negative moisture flux during the El-Niño is compensated with the positive moisture flux anomaly by IOD +ve especially in central India, and vice-versa during the La-Niña and IOD-ve events. It is known that the El-Niño events are often associated with IOD+ve events (Behera and Ratnam, 2018) and vice versa (the ENSO and IOD are positively correlated in our data sets). From the precipitation composites (Fig.3), in central India, an anomalous negative (positive) rainfall during the El Niño (La Niña) is observed, and during the IOD+ve (IOD-ve) a positive (partly negative) anomalous rainfall is observed. This could explain why both the IOD and ENSO states should be known together to explain the variability of the central Indian subcontinent rainfall as the IOD and ENSO are having compensating effects. This compensating behavior is not seen in the southern or northern part of the Indian subcontinent, hence this could explain the net redundant information between ENSO and IOD to the precipitation to the southern region. The readers are referred to Fig.3 by Barrett (2015) to further explore the relation of synergy dependence on the compensating influence from both sources, i.e., the correlation between two sources and to their targets respectively.

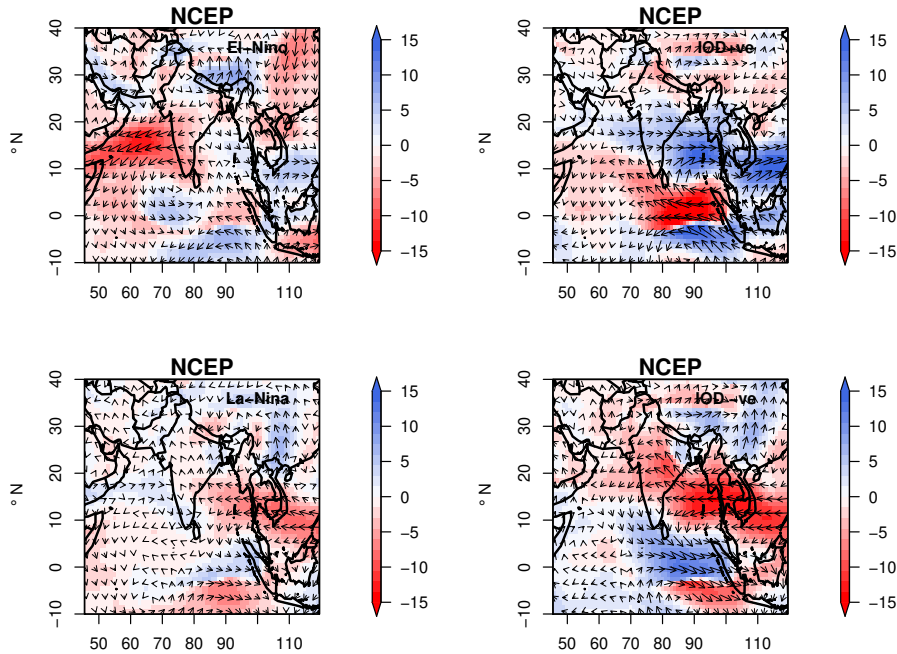

**Figure 6.** Moisture flux anomalies (g/kg m/sec) over the Indian subcontinent (JJAS) for El-Niño, La-Niña, IOD+ve and IOD-ve events observed in NCEP reanalysis data sets for the period of 1951-2005.

#### 4.2.2 Global and regional climate model simulations

Next, we are performing the same analysis, starting with the EOF patterns from the SST fields obtained from the three GCM simulations listed in Table 1, to investigate how the ENSO and IOD associated variability in the Indian and Pacific oceans are represented. Figure 7 shows the second EOF pattern of the SST anomalies over the Indian ocean and the first EOF pattern in the Pacific ocean, for the GCM simulations of MPI-ESM-LR, Nor-ESM-M, and EC-EARTH. It is found that all the GCM simulations replicate the zonal dipole like patterns over the Indian ocean and Pacific ocean similarly as the observations. The percentage of the total variability contributed by EOF1 of the Indian ocean is about 30% in all the GCM simulations (Fig. S7S8) which is comparable to the observations. The EOF2, which is associated with the IOD, explains about 15% of the total variance in all the GCMs, also similar to observations. The percentage of total variance contributed by the first EOF is between 20 – 25% in all the GCM simulations in the Pacific ocean, which is similar to variance in the observations. Thus, these results indicate that the variability associated with the SST anomalies over the Indian and the Pacific ocean is represented in the three GCM simulations. The SST anomaly composites during various phases of IOD and ENSO events (Fig. S8-S9 and Fig. S9S10) show that most of the GCM simulations can replicate the SST anomaly composite patterns found during the IOD+ve events in HadISST (Fig. S8S9). On the contrary, during IOD-ve events, the MPI-ESM-LR portrays unrealistic warm anomalies throughout the Indian ocean. Over the Pacific ocean, the MPI-ESM-LR and EC-EARTH have an unrealistic westward extension of the warm (cold) pool during El Niño (La Niña) events. The patterns from Nor-ESM-M are closer to the observation, shown

in Fig. S9S10. The unrealistic westward extension of the SSTs in EC-EARTH and MPI-ESM-LR simulations might influence the walker circulation through unrealistic large scale teleconnections patterns.

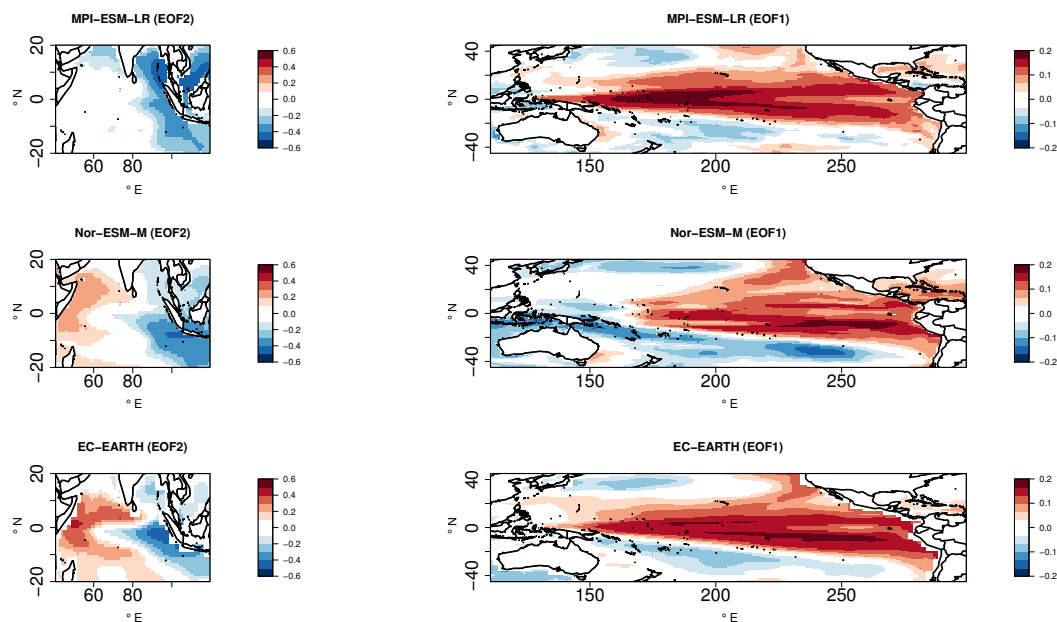

**Figure 7.** EOF2 patterns of SST anomalies for (JJAS) in the Indian ocean and EOF1 patterns for (JJAS) in the Pacific Ocean for three GCM simulations, i.e., MPI-ESM-LR, Nor-ESM-M and EC-EARTH for the period of 1951-2005.

410 Figure 8 represents the ISMR anomaly composites during the El-Niño, La-Niña, IOD+ve and, IOD-ve events for the three GCM simulations, the MPI-ESM-LR, Nor-ESM-M, and EC-EARTH, when selecting the associated years given by the respective PCs. The rainfall anomaly composites associated with the positive phase of ENSO show dry conditions over the northern/northwest parts of the Indian subcontinent in the MPI-ESM-LR, dry conditions throughout the Indian sub-continent in Nor-ESM-M. The EC-EARTH simulation does not show a clear rainfall anomaly signal. Similar opposite polarity of rainfall anomalies are observed in the La-Niña conditions in the MPI-ESM-LR and Nor-ESM-M simulations, while slight wet conditions in north-east India in EC-EARTH. For the IOD+ve events, MPI-ESM-LR shows dry conditions in the southwest, while the Nor-ESM-M simulation shows dry conditions in the northwest and the Himalayan region, the EC-EARTH does not show any variability. The Nor-ESM-M during the IOD-ve phase shows overall positive anomaly, while no clear signal is observed in MPI-ESM-LR and EC-EARTH. Overall, the ENSO phase signal is better replicated in Nor-ESM-M simulation and partly in  
 415 MPI-ESM-LR as in the observations, while most of the GCM simulations failed to replicate the regional rainfall asymmetric response in IOD events as in observations (except Nor-ESM-M, which partly can replicate the dipole patterns). This might be  
 420 due to the coarse resolution of GCMs which may not be able to replicate the fine-scale precipitation response to the IOD.

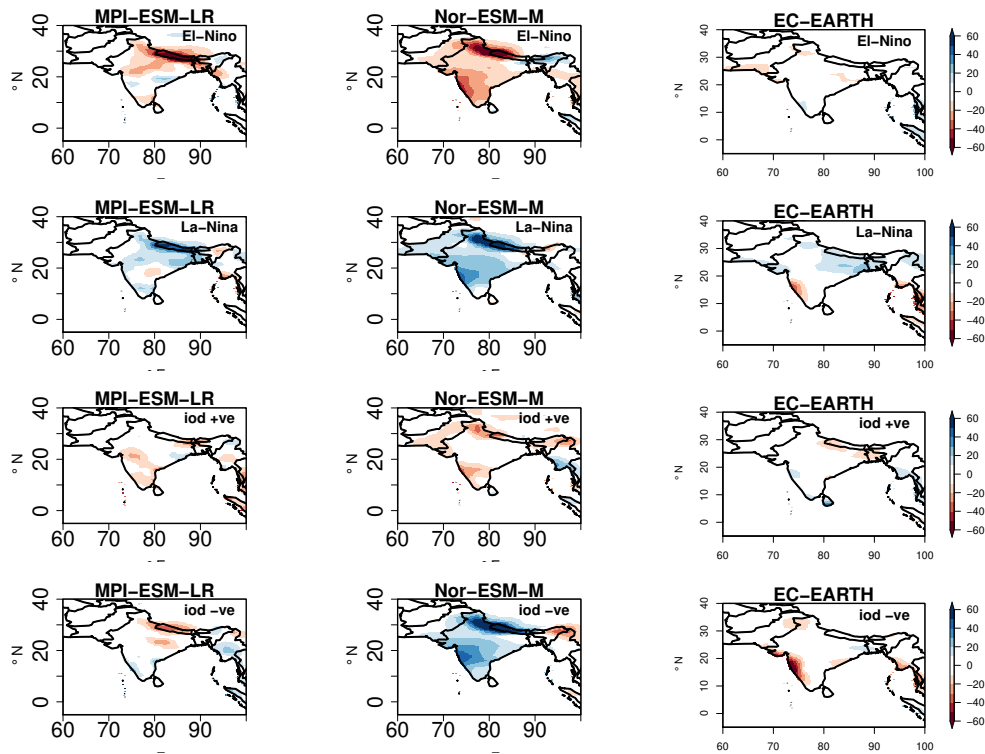

**Figure 8.** Total precipitation anomaly composites over the Indian subcontinent (JJAS) for El-Niño, La-Niña, positive IOD and negative IOD events in MPI-ESM-LR, Nor-ESM and EC-EARTH simulations(1951-2005)

Figure 9 represents the IE spatial patterns from the IOD and ENSO i.e.,  $I(PREC; IOD)$ ,  $I(PREC; ENSO)$ , the two-source IE,  $I(PREC; IOD, ENSO)$  together with the NET SYNERGY over the Indian subcontinent in the three GCM simulations i.e., MPI-ESM-LR, Nor-ESM-M, and EC-EARTH with the linear estimator. The information exchange from IOD to total precipitation in MPI-ESM-LR shows that the information from the IOD is exchanged to the southeastern part of the Indian Subcontinent. This is contrary to what is seen in the results from the observations, where most of the IE takes place to the leeward side of the western ghats and the northeastern sector of India. The Nor-ESM-M simulation shows that IE from IOD is transmitted to the western side of the Indian subcontinent, where the observed significant anomalies are noted in Fig. 9. The EC-EARTH does not show any information exchange from IOD to the land points over the Indian sub-continent. The  $I(PREC; ENSO)$  show that the northern parts of the Himalayas and north west-central India receive information from the Pacific ocean in MPI-ESM-LR. For Nor-ESM-M, the western ghats and its leeward side are influenced by ENSO. The EC-EARTH does not show as much IE as the Nor-ESM-M or MPI-ESM-LR over the Indian continent, with an exception for some scattered locations over the Himalayas.

The two-source information exchange  $I(PREC; ENSO, IOD)$  covers the northwest part of the Indian subcontinent for MPI-ESM-LR and the extreme southeast. For Nor-ESM-M the information exchange covers mostly the western part of India. The EC-EARTH show IE over isolated places of northeast India. These results indicate that the three GCMs exhibit a IE

pattern which is different from the observed patterns. Moreover, the results of the NET SYNERGY show that MPI-ESM-LR does not show any net synergistic IE over the Indian subcontinent, while in Nor-ESM-M the IOD and ENSO share common information over the west of India. EC-EARTH show less net synergy over the Indian sub-continent. Overall, the results from the IE exchange differ from the observations, seen for all the three GCM simulations. These results are consistent with Kernel and Kraskov estimators (figures not shown Fig. S11).

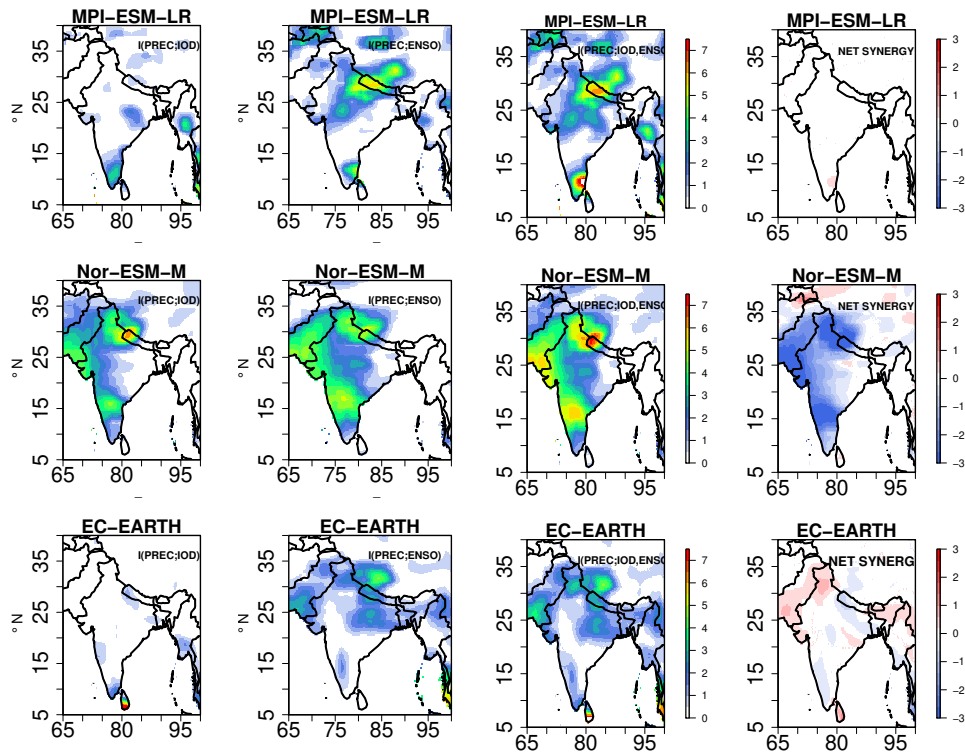

**Figure 9.** Information exchange from  $I(PREC; IOD)$ ,  $I(PREC; ENSO)$ , two-source information exchange  $I(PREC; ENSO, IOD)$  and  $NET SYNERGY \times 10^{-2}$  nats for the GCM simulations MPI-ESM-LR, Nor-ESM-M and EC-EARTH for JJAS (1951-2005). Only significant values at 95% confidence intervals are plotted.

Next, we are investigating how the two-source information exchange is represented when we dynamically downscale the three GCM simulations (MPI-ESM-LR, Nor-ESM-M, and EC-EARTH) with the regional model COSMO-crCLIM ( $0.22^\circ$ ). We are applying the same two-source information exchange method on the RCM fields as we have done for the GCM simulations. However, since the RCM simulations are only covering a limited area, namely the South Asian CORDEX domain, we had to combine the RCM results with the GCM simulations, in particular for the EOF-analysis over Indian and Pacific oceans. Figure 10 represents the ISMR anomaly composites during the positive IOD+ve, IOD-ve, El-Niño, and La-Niña events for the COSMO-crCLM RCM simulation driven with three GCM simulations, the MPI-ESM-LR, Nor-ESM-M, and EC-EARTH. Here we are selecting the same years as given by the principal components from the driving GCM simulations. The rainfall

anomaly composites associated with the El-Niño events show dry conditions over the northern parts of Himalayas for the downscaled MPI-ESM-LR and wet conditions in western ghats and isolated parts in central India. During the La-Niña phase, dry conditions in the central Indian subcontinent, western ghats and wet conditions elsewhere are observed. In the downscaled Nor-ESM-M, dry (wet) signal is observed throughout Indian subcontinent during El-Niño (La-Niña) phases. In the downscaled EC-EARTH, dry (wet) signal is observed throughout Indian subcontinent during El-Niño (La-Niña) phases. In the downscaled EC-EARTH, dry regions are noted throughout most parts of Indian subcontinent during El-Niño, while dry conditions are seen in central India and wet conditions elsewhere in La-Niña phase. The rainfall anomalies composites associated with the positive IOD in the observations, i.e., a meridional tripolar pattern with above than normal rainfall in central parts of India and below than normal rainfall to north and south of it is only observed in the downscaled Nor-ESM-M. Similarly, the negative IOD in downscaled Nor-ESM-M is associated with a zonal dipole having above (below) normal rainfall on the western (eastern) half of India similar to that of the observations as seen in Figure 5. Overall, these results suggest that the downscaled results from Nor-ESM-M better reproduces the spatial patterns of precipitation anomalies associated with ENSO and IOD, when comparing to the observations, than the downscaled results from EC-EARTH and MPI-ESM-LR.

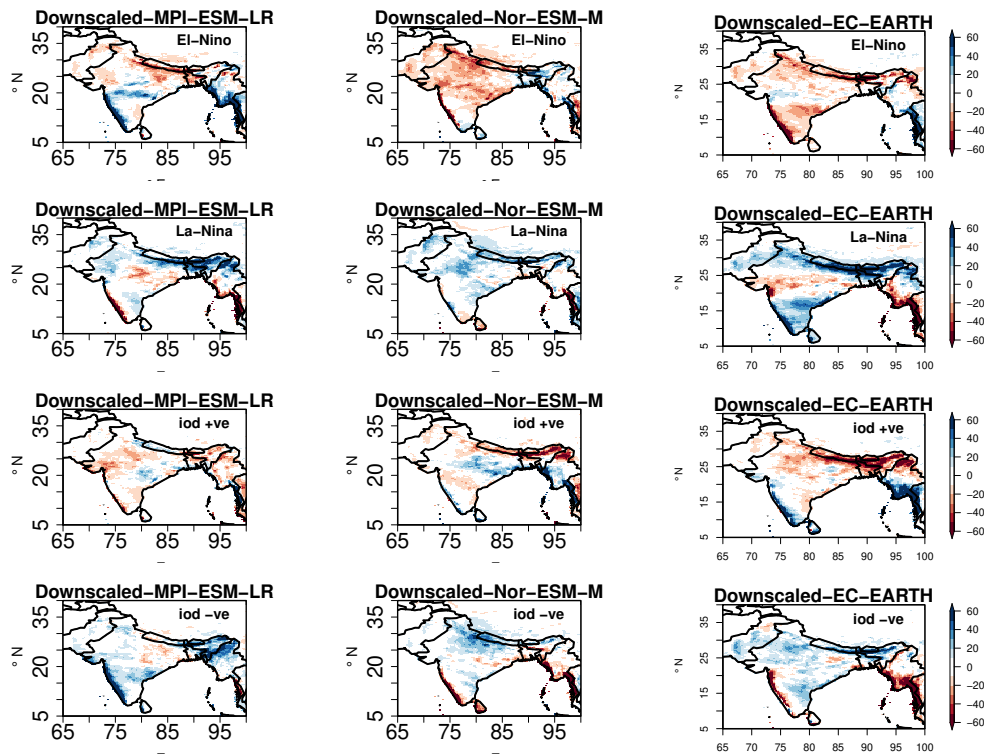

**Figure 10.** Total precipitation anomaly composites over the Indian subcontinent for El-Niño, La-Niña, positive IOD and negative IOD events for the downscaled COSMO-crCLM simulations driven by MPI-ESM-LR, Nor-ESM-M and EC-EARTH GCM simulations for JJAS (1951-2005)

Figure 11 represents the IE patterns over the Indian subcontinent for the downscaled RCM simulations with the Linear estimator (these patterns are also consistent with Kraskov [and Kernel \(Fig.S12\)](#) and [Kernel \(Fig.S13\)](#) estimators). The net synergy

465 in central India, and shared information in southern India is better represented in the downscaled Nor-ESM-M simulation, compared to the downscaled MPI-ESM-LR and downscaled EC-EARTH. This is in agreement with the results from the GCM simulation, where it was found that Nor-ESM-M simulation had a better replication of ENSO and IOD induced anomalous precipitation structures than the two other GCMs (see Fig. 10). These results are interesting, even though all the COSMO-crCLM simulations have the same physics and dynamics, only downscaled Nor-ESM-M replicated realistic patterns of IE.

470 The improvement in results in downscaled Nor-ESM-M can be attributed to a more realistic large-scale information coming from the GCM simulation, such as the moisture flux transport during various phases of ENSO and IOD events (see Fig. [S10](#) [S14](#) – Fig. [S14](#)–[S18](#) and Fig.6). For the MPI-ESM-LR and EC-EARTH GCM simulations, the moisture flux anomalies are very different from the reanalysis fluxes and thus seem misrepresented. A better replication of the moisture flux anomaly in Nor-ESM-M GCM simulation during ENSO and IOD might be from a better simulation of the large scale circulation patterns,

475 like the Walker and Hadley circulations, due to the better representation of the SST than the two other GCM simulations (Fig. S8 and Fig. S9). The RCM simulation results exhibit similar moisture flux anomalies compared to the driving GCM simulations, in which the downscaled Nor-ESM-M outperforms the downscaled MPI-ESM-LR and downscaled EC-EARTH. These results indicate that a realistic large-scale signal from the GCM simulations (e.g., the moisture transport and SST anomalies) is essential for an RCM to properly improve the GCM results in terms of IMSR variability. When the large-scale signal from

480 the GCM is incorrect, and wrong moisture fluxes are imposed on the lateral boundaries of the RCM, the downscaled results are hampered.

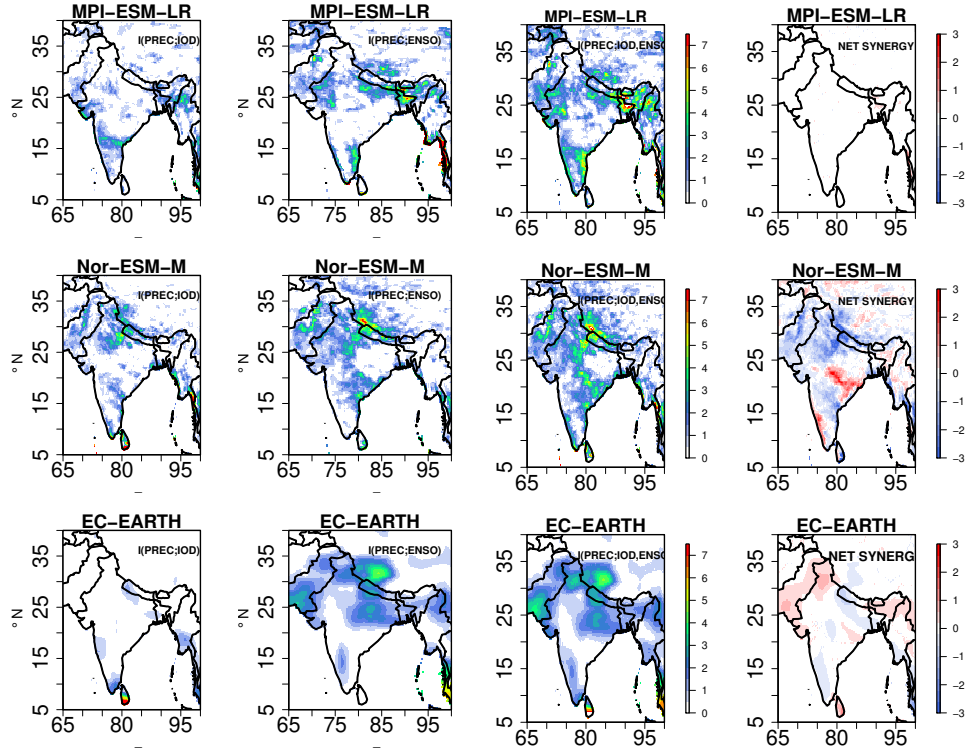

**Figure 11.** Information exchange from  $I(PREC;IOD)$ ,  $I(PREC;ENSO)$  and two-source information exchange  $I(PREC;ENSO,IOD)$ ,  $NET\ SYNERGY \times 10^{-2}$  nats for the downscaled COSMO-crCLM simulations for JJAS (1951-2005). Only significant values at 95% confidence intervals are plotted.

## 5 Conclusions

In this article, we explored two-source information exchange (IE) from ENSO and IOD (quantified by SST variabilities in the Pacific and Indian oceans) to the Indian Monsoon Summer Rainfall (IMSR) interannual variability. But, first, we used simple  
 485 idealized linear and non-linear dynamical systems to demonstrate the concepts of two-source IE. Results showed that both the linear and the non-linear idealized systems can exhibit positive net synergy (i.e., the combined influence of two sources is greater than their individual contributions). Interestingly, two uncorrelated sources can show positive net synergistic IE to a target.

The two-source ENSO and IOD to IMSR IE was explored in observations, reanalysis data sets, and in three GCM simulations  
 490 which were also further dynamically downscaled with the RCM. The results from the observations and reanalysis data suggest that both IOD and ENSO influence the interannual variability of the ISMR throughout most parts of Indian subcontinent. Interestingly, we found that IOD and ENSO exhibit positive net synergy over central India, which is the monsoon core region, and net redundant information over the southern part of India.



The IE patterns in the three GCM simulations differ from that in the observations. However, the GCM Nor-ESM-M better captured the precipitation anomalies from ENSO and partly from IOD than the other two GCMs. Previous studies also showed that Nor-ESM-M outperforms other CMIP5 GCM simulations in terms of rainfall climatology, and most aspects of the climatological annual cycle and interannual variability in the Indian subcontinent (Sperber et al., 2012; McSweeney et al., 2015).

Downscaling Nor-ESM-M simulation with the RCM COSMO-crCLM better replicated the observed IE patterns than downscaling the MPI-ESM-LR and EC-EARTH simulations. Importantly, the downscaled Nor-ESM-M IE results are in better agreement with the observations than the Nor-ESM-M results. Downscaling Nor-ESM-M adds value to the GCM simulation. This can not be concluded here for downscaling of MPI-ESM-LR and EC-EARTH simulations. Downscaling the latter simulations did not add value because of a missing realism in their large-scale SST patterns and horizontal moisture flux variability, which are important RCM boundary conditions and which were better represented in the Nor-ESM-M simulation. Downscaling did not compensate errors in the large-scale driving simulations. These results highlight the importance of the choice of GCM simulations when performing dynamically downscaling for high-resolution regional climate projections.

Finally, we propose to use the two-source IE metric as a complementary tool to gain additional insight into the climate system and to perform process-oriented climate model evaluation.

*Code availability.* The analysis is done in R and all codes can be provided upon request.

*Data availability.* The GCM and the RCM datasets are available at <https://esgf-data.dkrz.de/projects/esgf-dkrz/>. The ENSO and IOD index are taken from <http://www.esrl.noaa.gov/psd> and <http://www.jamstec.go.jp/> respectively.

*Author contributions.* The concept was proposed by, B.A. Funding was acquired by B.A. The information theory algorithms were developed by, P.K.P. and C.P. The RCM simulations were performed by, S.S. with assistance from P.K.P. The manuscript was written by, P.K.P. and reviewed by, B.A., S.S., and, C.P. All authors have read and approved the final manuscript.

*Competing interests.* The authors declare that they have no conflict of interest.

*Acknowledgements.* The authors acknowledge the support by the German Research Foundation (“Deutsche Forschungsgemeinschaft”, DFG) in terms of the research group FOR 2416 “Space-Time Dynamics of Extreme Floods (SPATE)”. The authors also thank Joseph T Lizer for providing the JDIT open source toolkit. CLMcom-ETH-COSMO-crCLIM-v1-1 simulations were run on Piz Daint at CSCS (Switzerland),

and we acknowledge PRACE for awarding us access and computing time to Piz Daint. We thank two reviewers for their constructive  
520 comments and insights.

## Appendix A: Non-linear Heñon system

As the climate system is non-linear, we further extend our analysis from idealized linear systems to a idealized non-linear  
system. For this purpose, we considered coupled Heñon maps which captures the stretching and folding dynamics of chaotic  
systems such as the Lorenz system which mimic's the atmospheric behavior. We considered two Heñon maps (Kraskovska, 2019),  
525  $x$  and  $y$  coupled with each other with the governing equations

$$\begin{aligned}x_t &= 1.4 - x_{t-1}^2 + 0.3x_{t-2}, \\y_t &= 1.4 - (Cx_{t-1}y_{t-1} + (1 - C)y_{t-1}^2) + 0.3y_{t-2},\end{aligned}\tag{A1}$$

where the coupling coefficients  $C \in [0, 0.6]$ . From Eq.A1 it is evident that the system  $x$  is driving system  $y$  through coupling  
coefficient  $C$ .

Figure A1 shows the information exchange in the non-linear Heñon system (equations given as in Equation A1). Figure  
530 A1 shows that the IE,  $I(y_t; x_{t-1})$  increases as the coupling coefficient  $C$  increases. It can be also observed that the opposite  
behavior i.e., information exchange from  $I(y_t; y_{t-1})$  decreases with increasing  $C$  due to the term  $(1 - C)y_{t-1}^2$  in Eq. 4. Also  
the IE from  $I(y_t; y_{t-1}) > I(y_t; x_{t-1})$  indicating that the target is tightly coupled with its own past (also seen in governing  
equations). In this case, the two-source IE is greater than  $I(y_t; y_{t-1})$  or  $I(y_t; x_{t-1})$  as expected, this is because both the  
sources are contributing to the target future state. Here the correlation between the two sources  $x_{t-1}$  and  $y_{t-1}$  is almost equal  
535 to zero. The net synergy increases with increase in the coupling coefficient indicating net synergistic IE by the two-sources.  
For this system we used 8 number of k-nearest neighbors for Kraskov estimator and 0.5 kernel width for Kernel estimator.

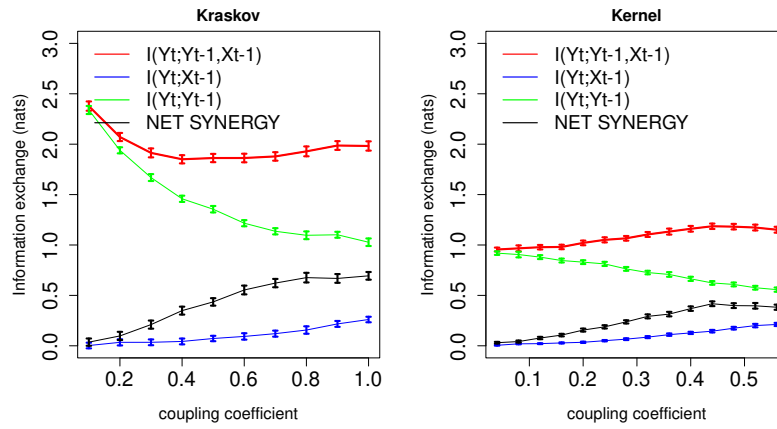

**Figure A1.** Information exchange in nats from two-source (red line), single source (green and blue lines), net synergy (black line) to target for Kraskov and Kernel estimators. The error bars represents two standard deviations of the 100 permuted samples.

## References

- Ashok, K., Guan, Z., Yamagata, T.: Impact of the Indian Ocean Dipole on the relationship between Indian monsoon rainfall and ENSO, *Geophys Res Lett*, 28, 4499–4502, <https://doi.org/10.1029/2001GL013294>, 2001.
- 540 Asharaf, S., Ahrens, B.: Indian Summer Monsoon Rainfall Feedback Processes in Climate Change Scenarios, *Journal of Climate*, 28(13), 5414–5429, doi: 10.1175/JCLI-D-14-00233.1, 2015.
- Akiyo, Kenji Kamiguchi, Osamu Arakawa, Atsushi Hamada, Natsuko Yasutomi, Akio Kitoh.: APHRODITE: Constructing a Long-Term Daily Gridded Precipitation Dataset for Asia Based on a Dense Network of Rain Gauges, *Bull. Amer. Meteor. Soc.*, 93, 1401–1415, doi: <http://dx.doi.org/10.1175/BAMS-D-11-00122.1>, 2012.
- 545 Barrett Adam: Exploration of synergistic and redundant information sharing in static and dynamical Gaussian systems, *Physical Review E*, 91 (5), 1539–3755, doi:<https://doi.org/10.1103/PhysRevE.91.052802>, 2015.
- Bhaskar, A., Ramesh, D.S., Vichare, G., Koganti, T., Gurubaran, S.: Quantitative assessment of drivers of recent global temperature variability: an information theoretic approach, *Clim. Dyn.*, 49, 3877–3886, doi:10.1007/s00382-017-3549-5, 2017.
- Bhaskaran, B., Ramachandran, A., Jones, R. and Moufouma-Okia, W.: Regional climate model applications on sub-regional scales over the  
550 Indian monsoon region: the role of domain size on downscaling uncertainty, *Journal of Geophysical Research: Atmospheres*, 117(D10), <https://doi.org/10.1029/2012JD017956>, 2012.
- Bennett Andrew, Bart Nijssen, Gengxin Ou, Martyn Clark and Grey Nearing: Quantifying process connectivity with transfer entropy in hydrologic models, *Water Resources Research*, 55(6),4613–4629, <https://doi.org/10.1029/2018WR024555>, 2019.
- Behera, S.K and Ratnam, J.K.: Quasi-asymmetric response of the Indian summer monsoon rainfall to opposite phases of the IOD, *Scientific reports*, 8,123, DOI:10.1038/s41598-017-18396-6, 2018.
- 555 Bertschinger, N., Rauh, J., Olbrich, E., Jost, J., Ay, N.: Quantifying unique information, *Entropy*, 16, 2161–2183, <https://doi.org/10.3390/e16042161>, 2014.
- Bentsen, M., Bethke, I., Debernard, Jens and Iversen, Trond and Kirkevag, Alf, Soerland, Øyvind, Drange, Helge, Roelandt, Caroline and Seierstad, I., Hoose, Corinna, Kristjánsson, J.: The Norwegian Earth System Model, NorESM1-M - Part 1: Description and basic evaluation, *Geoscientific Model Development Discussion*, 5, 2843–2931, DOI:10.5194/gmdd-5-2843-2012, 2012.
- 560 Cai, W., Cowan, T. and Sullivan A.: Recent unprecedented skewness towards positive Indian Ocean dipole occurrences and its impact on Australian rainfall, *Geophys. Res. Lett.*, 36, L11705, doi:10.1029/2009GL037604. 2009a.
- Cai, W., Sullivan, A. and Cowan, T.: Rainfall teleconnections with Indo-Pacific variability in the WCRP CMIP3 models, *J. Climate*, 22, 5046–5071, <https://doi.org/10.1175/2009JCLI2694.1>, 2009b.
- 565 Campuzano, SA., De Santis, A., Pavon-Carrasco, FJ., Osete, ML., Qamili, E.: New perspectives in the study of the Earth’s magnetic field and climate connection: The use of transfer entropy, *PLOS ONE*, 13(11), e0207270, <https://doi.org/10.1371/journal.pone.0207270>, 2018.
- Chowdary, JS., Bandgar, AB., Gnanaseelan, C., Luo, JJ.: Role of tropical Indian Ocean air-sea interactions in modulating Indian summer monsoon in a coupled model, *Atmos Sci Lett.*, 16,170–176, <https://doi.org/10.1002/asl2.561>, 2015.
- Choudhary, A., Dimri, A.P. and Maharana, P.: Assessment of CORDEX-SA experiments in representing precipitation climatology of summer  
570 monsoon over India, *Theor Appl Climatol.*, 134, 283–307, <https://doi.org/10.1007/s00704-017-2274-7>, 2018.
- Cover, T.M. and Thomas, J.A.: *Elements of Information Theory*, Wiley New York, NY, USA, 1991.
- Dobler, A., Ahrens, B.: Four climate change scenarios for the Indian summer monsoon by the regional climate model COSMO-CLM, *Journal of Geophysical Research Atmospheres*, 116, D24104, 13, doi:10.1029/2011JD016329, 2011.

- Dee, D.P., Uppala, S.M., Simmons, A.J., Berrisford, P., Poli, P., Kobayashi, S., Andrae, U., Balmaseda, M.A., Balsamo, G., Bauer, P.,  
575 Bechtold, P., Beljaars, A.C.M., van de Berg, L., Bidlot, J., Bormann, N., Delsol, C., Dragani, R., Fuentes, M., Geer, A.J., Haimberger, L.,  
Healy, S.B., Hersbach, H., Hólm, E.V., Isaksen, L., Kållberg, P., Köhler, M., Matricardi, M., McNally, A.P., Monge-Sanz, B.M., Morcrette,  
J.-J., Park, B.-K., Peubey, C., de Rosnay, P., Tavolato, C., Thépaut, J. N. and Vitart, F.: The ERA-Interim reanalysis: configuration and  
performance of the data assimilation system, *Q.J.R. Meteorol. Soc.*, 137, 553-597, doi:10.1002/qj.828, 2011.
- Doms, G., Forstner, J., Heise, E., Herzog, H.J., Mironov, D., Raschendorfer, M., Reinhardt, T., Ritter, B., Schrodin, R., Schulz, J.P., Vogel,  
580 G.: A Description of the Nonhydrostatic Regional Model LM, Part II: Physical Parameterization, DWD, 2011
- Finn, C. and Lizer, J.T.: Pointwise Partial Information Decomposition Using the Specificity and Ambiguity Lattices, *Entropy*, 20, 297,  
https://doi.org/10.3390/e20040297, 2018.
- Fuhrer, O., Osuna, C., Lapillonne, X., Gysi, T., Cumming, B., Bianco, M., Arteaga, A., and Schulthess, T. C.: Towards a performance  
portable, architecture agnostic implementation strategy for weather and climate models, *Supercomputing frontiers and innovations*,  
585 http://superfri.org/superfri/article/view/17, 2014.
- Gerken, T., Ruddell B.L., Yu, R., Stoy, P.C. and Drewry, D.T.: Robust observations of land-to-atmosphere feedbacks using the information  
flows of FLUXNET, *NPJ Climate and Atmospheric Science*, 2,37, https://www.nature.com/articles/s41612-019-0094-4, 2019.
- Gadgil, S.: Indian monsoon and its variability, *Annu Rev Earth Planet Sci.*, 31,429–467,  
https://doi.org/10.1146/annurev.earth.31.100901.141251, 2003.
- 590 Goswami, B. N.: Inter-annual variations of Indian summer monsoon in a GCM: External conditions versus internal feedbacks, *J. Climate*,  
11, 501-522, https://doi.org/10.1175/1520-0442(1998)011<0501:IVOISM>2.0.CO;2, 1998.
- Goswami, BN., Madhusoodanan, MS., Neema, CP., Sengupta, D.: A physical mechanism for North Atlantic SST influence on the Indian  
summer monsoon, *Geophys Res Lett*, 33:L02706, https://doi.org/10.1029/2005GL024803, 2006a.
- Goodwell, A. and Kumar, P.: Temporal Information Partitioning Networks (TIPNets): A process network approach to infer ecohydrologic  
595 shifts, *Water Resour. Res.*, 53, 5899–5919, https://doi.org/10.1002/2016WR020218, 2017.
- Griffith V., Koch C.: Quantifying Synergistic Mutual Information. In: Prokopenko M. (eds) *Guided Self-Organization: Inception. Emergence,  
Complexity and Computation*, vol 9. Springer, Berlin, Heidelberg, https://doi.org/10.1007/978-3-642-53734-9-6, 2014.
- Giorgi, F., Jones, C. and Asrar, GR.: Addressing climate information needs at the regional level: the CORDEX framework. *World Meteorol  
Organ Bull* 58(3):175–183, 2009.
- 600 Gutowski, J. W., Giorgi, F., Timbal, B., Frigon, A., Jacob, D., Kang, H. S., Raghavan, K., Lee, B., Lennard, C., Nikulin, G., O'Rourke, E.,  
Rixen, M., Solman, S., Stephenson, T., Tangang, F.: WCRP COordinated Regional Downscaling EXperiment (CORDEX): A diagnostic  
MIP for CMIP6. *Copernicus GmbH* 9(11),4087-4095, 2016.
- Hrudya, P H., Hamza Varikoden, Vishnu, R.: A review on the Indian summer monsoon rainfall, variability and its association with ENSO  
and IOD, *Meteorology and Atmospheric Physics*, 11, https://doi.org/10.1007/s00703-020-00734-5, 2020.
- 605 Hazeleger, W., and Coauthors, 2010: EC-Earth: a seamless earth-system prediction approach in action. *Bull. Amer. Meteor. Soc.*, 91,  
1357–1363. doi: 10.1175/2010BAMS2877.1, 2010.
- Jiang, P. and Kumar, P.: Using Information Flow for Whole System understanding from component dynamics, *Water Resources Research*,  
55,8305-8329, https://doi.org/10.1029/2019WR025820, 2019.
- James, R.G., Barnett, N., Crutchfield, J.P.: Information flows? A critique of transfer entropies, *Phys. Rev. Lett.*, 116, 238701,  
610 https://doi.org/10.1103/PhysRevLett.116.238701,2016.

- Joshua Garland, Tyler, R., Jones, Michael Neuder, James, W. C., White and Elizabeth Bradley.: An information-theoretic approach to extracting climate signals from deep polar ice cores, *Chaos*, 29(10),101105, <https://aip.scitation.org/doi/abs/10.1063/1.5127211>, 2019.
- Knuth, K.H., Gotera, A., Curry, C.T., Huyser, K.A., Wheeler, K.R., Rossow, W.B.: Revealing relationships among relevant climate variables with information theory, arXiv:1311.4632, 2013.
- 615 Krishnaswami, J., Vaidyanathan, S., Rajagopalan, B., Bonnel, M., Sankaran, M., Bhalla, R.S., Badiger, S.: Non-stationary and non-linear influence of ENSO and Indian Ocean Dipole on Indian summer monsoon rainfall and extreme rain events, *Clim Dyn.*, <https://doi.org/10.1007/s00382-014-2288-0>, 2015.
- Kantz, H., Schreiber, T.: *Nonlinear Time Series Analysis*, Cambridge University Press, Cambridge, UK, 1997.
- 620 Kraskov, A., Stogbauer, H., Grassberger, P.: Estimating mutual information, *Phys. Rev. E*, 69, 066138, doi:10.1103/PhysRevE.69.066138, 2004.
- Kalnay et al.: The NCEP/NCAR 40-year reanalysis project, *Bull. Amer. Meteor. Soc.*, 77, 437-470, 1996.
- Krakovska, A.: Correlation Dimension Detects Causal Links in Coupled Dynamical Systems, *Entropy* 21, 818, <https://doi.org/10.3390/e21090818>, 2019.
- Krishna Kumar, K., Rajagopalan, B., Hoerling, M., Bates, G, and Cane, M.: Unraveling the mystery of Indian monsoon failure during El Niño, *Science*, 314(5796), 115–119, DOI: 10.1126/science.1131152, 2006.
- 625 Leonardo Novelli, Wollstadt, Patricia, Mediano, Pedro, Wibral, Michael, Lizier, Joseph T.: Large-scale directed network inference with multivariate transfer entropy and hierarchical statistical testing, *Network Neuro science*,3,827-847, <https://doi.org/10.1162>, 2019.
- Lizier, J.T. JIDT: an information theoretic toolkit for studying the dynamics of complex systems, *Front. Robot., AI* 2014, 1, 11, <https://doi.org/10.3389/frobt.2014.00011>, 2014.
- 630 Liu, L., Yu, W. and Li T.: Dynamic and thermodynamic air–sea coupling associated with the Indian Ocean dipole diagnosed from 23 WCRP CMIP3 models, *J. Climate*, 24, 4941–4958, <https://doi.org/10.1175/2011JCLI4041.1>, 2011.
- Lucas-Picher, P., Christensen, JH., Saeed, F., Kumar, P., Asharaf, S., Ahrens, B., Wiltshire, A., Jacob, D., and Hagemann S.: Can regional climate models represent the Indian Monsoon?, *J. of Hydrometeorology*, 12, 849-868, doi:10.1175/2011JHM1327.1, 2011.
- 635 Leutwyler, D., Fuhrer, O., Lapillonne, X., Lüthi, D., and Schaer, C.: Towards European-scale convection-resolving climate simulations with GPUs: a study with COSMO 4.19, *Geosci. Model Dev.*, 9,3393–3412, <https://doi.org/10.5194/gmd-9-3393-2016>, 2016.
- McSweeney, C.F., Jones, R.J., Lee, R.W. and Rowell, P.D: Selecting CMIP5 GCMs for downscaling over multiple regions, *Clim Dyn.*, 44,3237–3260, DOI 10.1007/s00382-014-2418-8, 2015.
- Nowack, P., Runge, J., Erling, V. and Haigh.: Causal networks for climate model evaluation and constrained projections, *Nature Communications*, 11:1415, <https://doi.org/10.1038/s41467-020-15195-y>, 2020.
- 640 Nair, P.J., Chakraborty, A., Varikoden, H., Francis, P.A., Kuttipurath, J.: The local and global climate forcings induced inhomogeneity of Indian rainfall, *Nature*, <https://doi.org/10.1038/s41598-018-24021>, 2018.
- Palmer, T., Brankovic, C., Viterbo, P. and Miller, M.: Modeling interannual variations of summer monsoons, *J. Clim.*, 5(5), 399–417, [https://doi.org/10.1175/1520-0442\(1992\)005<0399:MIVOSM>2.0.CO;2](https://doi.org/10.1175/1520-0442(1992)005<0399:MIVOSM>2.0.CO;2), 2006.
- Pothapakula, P.K., Primo, C., Ahrens, B.: Quantification of Information Exchange in Idealized and Climate System Applications, *Entropy* 2019, 21, 1094, <https://doi.org/10.3390/e21111094>, 2019.
- 645 Pillai, P.A., Chowdary, J.S.: Indian summer monsoon intraseasonal oscillation associated with the developing and decaying phase of El Niño, *Int J Climatol*, 36,1846–1862, <https://doi.org/10.1002/joc.4464>, 2016.

- Ruddell, B. L., Drewry, D. T., Nearing, G. S.: Information theory for model diagnostics: structural error is indicated by tradeoffs between functional and predictive performance. *Water Resources Research*, 55,6534-6554, <https://doi.org/10.1029/2018WR023692>, 2019.
- 650 Runge, J., Bathiany, S., Bollt, E., Camps-Valls, G., Coumou, D., Deyle, E. and Glymour, C.: Inferring Causation from Time Series in Earth System Sciences, *Nature Communications*, 10-2553, <https://doi.org/10.1038/s41467-019-10105-3>, 2019.
- Runge, J., Petoukhov, V., Kurth, J.: Quantifying the strength and delay of climatic interactions: The ambiguities of cross correlation and a novel measure based on graphical models, *J. Clim.*, 27, 720–739, <https://doi.org/10.1175/JCLI-D-13-00159.1>, 2014.
- Rockel, B., Will, A. and Hense, A.: The regional climate model COSMO-CLM (CCLM), *Meteorologische Zeitschrift*, 17, 347–348, 2008.
- 655 Rienecker, M.M., Suarez, M.J., Gelaro, R., Todling, R., Bacmeister E J., Liu, Bosilovich, M.G., Schubert, S.D., Takacs, L., Kim, A., Bloom, S., Chen, J., Collins, D., Conaty A., da Silva, A., Gu, W., Joiner, J., Koster, RD., Lucchesi, R., Molod, A., Owens, T., Pawson, S., Pegion, P., Redder, C.R., Reichle R., Robertson, F.R., Ruddick, AG., Sienkiewicz, M., and J. Woollen J.: MERRA: NASA’s Modern-Era Retrospective Analysis for Research and Applications, *J. Climate*, 24, 3624–3648, <https://doi.org/10.1175/JCLI-D-11-00015.1>, 2011.
- Ritter, B., and Geleyn, J.F.: A comprehensive radiation scheme for numerical weather prediction models with potential applications in climate 660 simulations, *Mon. Weather Rev.*, 120(2), 303–325, [https://doi.org/10.1175/1520-0493\(1992\)120<0303:ACRSFN>2.0.CO;2](https://doi.org/10.1175/1520-0493(1992)120<0303:ACRSFN>2.0.CO;2), 1992.
- Raschendorfer, M.: The new turbulence parametrization of LM, *COSMO Newsl.*, 1, 90–98, 2001.
- Rayner, N. A., Parker, D. E., Horton, E. B., Folland, C. K., Alexander, L. V., Rowell, D. P., Kent, E. C., Kaplan, A.: Global analyses of sea surface temperature, sea ice, and night marine air temperature since the late nineteenth century, *J. Geophys.*, 108,D14, <https://doi.org/10.1029/2002JD002670>, 2002.
- 665 Shoaib Ahmad. Information-theoretic model of self-organizing fullerenes and the emergence of C60, *Chemical Physics Letters*, 10.1016/j.cplett.2018.10.024, 2018.
- Shannon, C.E.: *A Mathematical Theory of Communication*. Bell Labs Tech. J. 27, 379–423, 1948.
- Smirnov Dmitry A.: Spurious causalities with transfer entropy, *Phys. Rev. E.*, 87, 042917, DOI: 10.1103/PhysRevE.87.042917, 2013.
- Sabeerali, CT., Ajayamohan, RS., Bangalath, HK., Chen, N. Atlantic Zonal Mose: an emerging source of Indian summer monsoon variability 670 in a warming world, *Geophys Res Lett.*, 46,4460–4464, <https://doi.org/10.1029/2019GL082379>, 2019.
- Saji, NH., Goswami, BN., Vinayachandran PN., Yamagata T.: A dipole mode in the tropical Indian Ocean, *Nature*, 401,360–363, <https://doi.org/10.1038/43854>, 1999.
- Saji, N. H., Xie, SP., and Yamagata, T.: Tropical Indian Ocean variability in the IPCC twentieth-century climate simulations, *J. Climate*, 19, 4397–4417, <https://doi.org/10.1175/JCLI3847.1>, 2006.
- 675 Slingo, J., and Annamalai. H.: 1997: The El Niño of the century and the response of the Indian summer monsoon, *Mon. Weather Rev.*, 128(6), 1778–1797, [https://doi.org/10.1175/1520-0493\(2000\)128<1778:TENOOT>2.0.CO;2](https://doi.org/10.1175/1520-0493(2000)128<1778:TENOOT>2.0.CO;2), 2000.
- Shukla, RP., Haung, B.: Interannual variability of the Indian summer monsoon associated with the air-sea feedback in the northern Indian Ocean, *Clim Dyn.*, 46,1977–1990, <https://doi.org/10.1007/s00382-015-2687-x>, 2016.
- Schneider,U., Fuchs, T., Meyer-Christoffer, A. and Rudolf,B.: Global Precipitation Analysis Products of 680 the GPCP, [ftp://ftp-anon.dwd.de/pub/data/gpcp/PDF/GPCP\\_intro\\_products2008.pdf](ftp://ftp-anon.dwd.de/pub/data/gpcp/PDF/GPCP_intro_products2008.pdf), *Global Pre – cip.Climatol.Cent., Dtsch.Wetterdienst, OffenbachamMain, Germany.*, 2008.
- Stevens, B., and Coauthors.: The atmospheric component of the MPI-M Earth System Model: ECHAM6, *J. Adv. Model. Earth Syst.*, 5, 146–172, <https://doi.org/10.1002/jame.20015>, 2017.
- Schrodin, E., and Heise, E.: A New Multi-Layer Soil Model. *COSMO Newsletter No. 2* ,149-151, 2002.

- 685 Schlemmer Linda, Christoph Schaer, Daniel Luethi and Lukas Strebel.: A Groundwater and Runoff Formulation for Weather and Climate Models, 10-1809-1832, doi: <https://doi.org/10.1029/2017MS001260>, 2018.
- Sperber, K.R., Annamalai, H., Kang, I.S., Kitoh, A., Moise, A., Turner, A., Wang, B, and Zhou, T: The Asian summer monsoon: an intercomparison of CMIP5 vs. CMIP3 simulations of the late 20th century, *Clim Dyn.*, 41,2711–2744, DOI 10.1007/s00382-012-1607-6, 2012.
- 690 Tiedtke, M.: A comprehensive mass flux scheme for cumulusparameterization in large-scale models, *Mon. Weather Rev.*, 117,1779–1800, 1989.
- Wibral, M., Finn, C., Wollstadt, P., Lizier, J.T., Priesemann, V.: Quantifying Information Modification in Developing Neural Networks via Partial Information Decomposition, *Entropy*, 19, 494, doi:10.3390/e19090494, 2017.
- Williams, P.L., Beer, R.D.: Nonnegative decomposition of multivariate information. *arXiv* 2010, arXiv:1004.2515, 2010.
- 695 Walker, G.: Correlations in seasonal variations of weather, *Mem. Indian Meteorol. Dep.*, 24, 275–332, 1924.
- Webster, P.J., Magna, V., Palmer, T., Shukla, J., Tomas, R.A., Yanai, M., Yasunari, T.: Monsoons: processes, predictability and the prospects for prediction, *J Geophys Res.*, 103,14451–14510, <https://doi.org/10.1029/97JC02719>, 1988.
- Yun, K.S., Timmermann A.: Decadal monsoon-ENSO relationships reexamined, *Geophys Res Lett.*, 45,2014-2021, <https://doi.org/10.1002/2017G L07691>, 2018.
